# Supplementary material for: Mitigating Financial Burden of Tuberculosis through Active Case Finding Targeting Household and Neighbourhood Contacts in Cambodia
Source: PubMed Central journal article supplement (PMC5017748; doi:10.1371/journal.pone.0162796), 2016-09-09
Supplement: pone.0162796.s001.pdf [file pone.0162796.s001.pdf]

Participant code: \_\_\_\_\_

| 1 General Information    |                                                                                                   |
|--------------------------|---------------------------------------------------------------------------------------------------|
| 1.1 Interviewer Name     | <input type="checkbox"/> Chamroen <input type="checkbox"/> Fanita <input type="checkbox"/> Faramy |
| 1.2 Date (dd.mm.yy)      |                                                                                                   |
| 1.3 Village              |                                                                                                   |
| 1.4 Health centre        |                                                                                                   |
| 1.5 Operational District |                                                                                                   |

| 2 Patient Information<br>(to be filled in by interviewer with the help of TB&Lab register)                                                                       |                                                                                                                                                                                                                                                   |
|------------------------------------------------------------------------------------------------------------------------------------------------------------------|---------------------------------------------------------------------------------------------------------------------------------------------------------------------------------------------------------------------------------------------------|
| 2.1 Gender <input type="checkbox"/> Male <input type="checkbox"/> Female                                                                                         | 2.2 Age of Patient .....                                                                                                                                                                                                                          |
| 2.3 Type of TB                                                                                                                                                   | <input type="checkbox"/> Bacteriological positive <input type="checkbox"/> Bacteriological negative                                                                                                                                               |
| 2.4 Total duration of treatment                                                                                                                                  | <input type="checkbox"/> 6 months <input type="checkbox"/> 8 months <input type="checkbox"/> Other(specify): _____                                                                                                                                |
| 2.5 Treatment Regimen                                                                                                                                            | <input type="checkbox"/> New Pulmonary <input type="checkbox"/> Retreatment                                                                                                                                                                       |
| 2.6 Interviewee                                                                                                                                                  | <input type="checkbox"/> Patient <input type="checkbox"/> Guardian<br>If Guardian... <input type="checkbox"/> Parent <input type="checkbox"/> Grandparent <input type="checkbox"/> Extended Family <input type="checkbox"/> Other(specify): _____ |
| 2.7 HIV status (only if indicated)                                                                                                                               | <input type="checkbox"/> Positive <input type="checkbox"/> Negative <input type="checkbox"/> Not tested <input type="checkbox"/> Unknown <input type="checkbox"/> Declined                                                                        |
| 2.8 Participant Category                                                                                                                                         |                                                                                                                                                                                                                                                   |
| a1 <input type="checkbox"/> ACF ( <input type="checkbox"/> select Household or <input type="checkbox"/> Neighborhood)                                            | b1 <input type="checkbox"/> PCF                                                                                                                                                                                                                   |
| a2 HC registration number:                                                                                                                                       | b2 HC registration number:                                                                                                                                                                                                                        |
| a3 OD registration number:                                                                                                                                       | b3 OD registration number:                                                                                                                                                                                                                        |
|                                                                                                                                                                  | (dd.mm.yy)                                                                                                                                                                                                                                        |
| a4 Date of receiving ACF information                                                                                                                             | b4 Date of smear examination                                                                                                                                                                                                                      |
| a5 Date of ACF Session                                                                                                                                           | b5 Date of Xray result                                                                                                                                                                                                                            |
| a6 Date of registration at HC                                                                                                                                    | b6 Date of registration at HC                                                                                                                                                                                                                     |
| a7 Date treatment started                                                                                                                                        | b7 Date treatment started                                                                                                                                                                                                                         |
| a8 Date of treatment completion                                                                                                                                  | b8 Date of treatment completion                                                                                                                                                                                                                   |
| 2.9 Marital Status <input type="checkbox"/> Married <input type="checkbox"/> Single <input type="checkbox"/> Divorced/separated <input type="checkbox"/> Widowed |                                                                                                                                                                                                                                                   |
| 2.10 Residence                                                                                                                                                   | <input type="checkbox"/> Urban <input type="checkbox"/> Suburban <input type="checkbox"/> Rural <input type="checkbox"/> Homeless/displaced                                                                                                       |
| 2.11 Phone number of patient                                                                                                                                     |                                                                                                                                                                                                                                                   |

| 3 Health Seeking                                                                                    |                                                          |
|-----------------------------------------------------------------------------------------------------|----------------------------------------------------------|
| 3.1 Did you have any TB symptoms before diagnosis? (If no go to question 3.3)                       | <input type="checkbox"/> Yes <input type="checkbox"/> No |
| 3.2 How long did you experience these symptoms before TB treatment initiation?                      | When did it start?(dd.mm.yy)                             |
| Cough <input type="checkbox"/> Yes <input type="checkbox"/> No _____ days                           | Date of onset: _____                                     |
| Coughing up blood (Haemoptysis) <input type="checkbox"/> Yes <input type="checkbox"/> No _____ days | Date of onset: _____                                     |
| Sputum <input type="checkbox"/> Yes <input type="checkbox"/> No _____ days                          | Date of onset: _____                                     |
| Night sweats <input type="checkbox"/> Yes <input type="checkbox"/> No _____ days                    | Date of onset: _____                                     |
| Weight loss <input type="checkbox"/> Yes <input type="checkbox"/> No _____ days                     | Date of onset: _____                                     |

Participant code: \_\_\_\_\_

|                        |                              |                             |            |                      |
|------------------------|------------------------------|-----------------------------|------------|----------------------|
| Chest pain             | <input type="checkbox"/> Yes | <input type="checkbox"/> No | _____ days | Date of onset: _____ |
| Fatigue                | <input type="checkbox"/> Yes | <input type="checkbox"/> No | _____ days | Date of onset: _____ |
| Fever                  | <input type="checkbox"/> Yes | <input type="checkbox"/> No | _____ days | Date of onset: _____ |
| Other (specify): _____ | <input type="checkbox"/> Yes | <input type="checkbox"/> No | _____ days | Date of onset: _____ |

**3.3** Did you seek treatment or advice for these symptoms at any of the following?  
(check all that apply)  
Where did you first go? (circle first place of treatment)

|                         |                              |                             |                                |                              |                             |
|-------------------------|------------------------------|-----------------------------|--------------------------------|------------------------------|-----------------------------|
| Government Hospital     | <input type="checkbox"/> Yes | <input type="checkbox"/> No | Health Center                  | <input type="checkbox"/> Yes | <input type="checkbox"/> No |
| Private hospital/clinic | <input type="checkbox"/> Yes | <input type="checkbox"/> No | Pharmacy, drug & grocery store | <input type="checkbox"/> Yes | <input type="checkbox"/> No |
| Traditional healer      | <input type="checkbox"/> Yes | <input type="checkbox"/> No | Other(specify): _____          | <input type="checkbox"/> Yes | <input type="checkbox"/> No |

**3.4** How far is the nearest government facility for

**a** TB diagnosis and treatment \_\_\_\_\_ minutes walking \_\_\_\_\_ minutes with transport \_\_\_\_\_ Distance (Km)

**b** TB treatment only \_\_\_\_\_ minutes walking \_\_\_\_\_ minutes with transport \_\_\_\_\_ Distance (Km)

**Section 4: Please fill out separate sheet and provide detail information on Pre diagnosis & diagnosis costs**

| 5 Treatment Costs                                                                                                                                                                                                                         |  |
|-------------------------------------------------------------------------------------------------------------------------------------------------------------------------------------------------------------------------------------------|--|
| <b>Costs related to DOT</b>                                                                                                                                                                                                               |  |
| <b>5.1</b> Where did you take your TB drugs?<br><input type="checkbox"/> Health facility/hospital <input type="checkbox"/> Home <input type="checkbox"/> Community <input type="checkbox"/> Workplace <input type="checkbox"/> Dispensary |  |
| <b>5.2 a.</b> How many times per week did you have to go there to take your drugs? _____ times per week                                                                                                                                   |  |
| <b>b.</b> How long did you have to go there to take your drugs? Duration: _____ weeks                                                                                                                                                     |  |
| <b>5.3</b> How long did it take you to get there (one way)?<br>_____ minutes walking _____ minutes with transport    Other(specify): _____                                                                                                |  |
| <b>5.4</b> How long did one of these visits take on average, including time on the road and waiting time? _____ minutes                                                                                                                   |  |
| <b>5.5</b> From your home to the DOT place (selected in 5.1), how much did it cost if you took transport? (both ways)<br>_____ Riel                                                                                                       |  |
| <b>5.6</b> How much did you spend on food? On the road, while waiting, for lunch?<br>_____ Riel                                                                                                                                           |  |
| <b>Costs related to <input type="checkbox"/> picking up TB drugs or <input type="checkbox"/> drug delivery</b>                                                                                                                            |  |
| <b>5.7 a.</b> How often did you travel to the health facility/ hospital to pick up your TB drugs? _____ Times / month                                                                                                                     |  |
| <b>b.</b> How long did you travel there to pick up your TB drugs? Duration: _____ months                                                                                                                                                  |  |
| <b>5.8</b> How long did it take you to get there (one way)?                                                                                                                                                                               |  |

Participant code: \_\_\_\_\_

|                                                                                                                                                                                     |                                                          |
|-------------------------------------------------------------------------------------------------------------------------------------------------------------------------------------|----------------------------------------------------------|
| _____ minutes walking _____ minutes with transport                                                                                                                                  | Other(specify): _____                                    |
| <b>5.9</b> How long did one of these visits take on average, including time on the road and waiting time?                                                                           | _____ minutes                                            |
| <b>5.10</b> From your home to the facility, how much did it cost if you took transport? (both ways)                                                                                 | _____ Riel                                               |
| <b>5.11</b> If you went to a facility to pick up your TB drugs, how much did you spend on food? On the road, while waiting, for lunch?                                              | _____ Riel                                               |
| <b>5.12</b> Did you have to pay administration fees or delivery when picking up your TB drugs?                                                                                      | <input type="checkbox"/> Yes <input type="checkbox"/> No |
| <b>a</b> If yes, how much?                                                                                                                                                          | _____ Riel                                               |
| <b>5.13</b> Did you have any accommodation costs when picking up your TB drugs?                                                                                                     | <input type="checkbox"/> Yes <input type="checkbox"/> No |
| <b>a</b> If yes, how much?                                                                                                                                                          | _____ Riel                                               |
| <b>5.14</b> Did you pay for TB drugs?                                                                                                                                               | <input type="checkbox"/> Yes <input type="checkbox"/> No |
| <b>a</b> If yes, how much?                                                                                                                                                          | _____ Riel                                               |
| <b>Costs related to follow up tests</b>                                                                                                                                             |                                                          |
| <b>5.15</b> Did you ever have to go to the health facility in addition to your regular visits for follow up tests since the beginning of your treatment? (If no go to question 6.1) | <input type="checkbox"/> Yes <input type="checkbox"/> No |
| <b>a</b> If yes how many times?                                                                                                                                                     | _____ times                                              |
| <b>5.16</b> If yes, did you have to pay any additional costs at any time of these visits?                                                                                           | <input type="checkbox"/> Yes <input type="checkbox"/> No |
| <b>a</b> If so, what kind of costs and how much per visit?                                                                                                                          |                                                          |
| Fees: _____ Sputum Test: _____ X-ray: _____                                                                                                                                         |                                                          |
| Other: _____ Total: _____                                                                                                                                                           |                                                          |
| <b>5.17</b> How long did one of these follow-up visits take on average, including time on the road, waiting time and tests? (total turnaround time)                                 | _____ minutes                                            |
| <b>5.18</b> How much did you spend on transport, food and accommodation for each visit on average?                                                                                  |                                                          |
| Transport: _____ Food: _____ Accommodation: _____                                                                                                                                   |                                                          |

|                                                                                                                                                                                                                                                  |                                                          |
|--------------------------------------------------------------------------------------------------------------------------------------------------------------------------------------------------------------------------------------------------|----------------------------------------------------------|
| <b>6</b>                                                                                                                                                                                                                                         | <b>Guardian Costs</b>                                    |
| <b>6.1</b> If any family/friend/DOT supporter accompany you on any visit during TB treatment / follow-up visit/picking up TB drugs / and coming to your place for DOT, did they pay additional cost for their visits? (If no go to question 7.1) | <input type="checkbox"/> Yes <input type="checkbox"/> No |
| <b>a</b> If yes, on how many visits did your family/friend/DOT supporter accompany you or go in your place?                                                                                                                                      |                                                          |
| Treatment/follow-up visit: _____ times                                                                                                                                                                                                           |                                                          |
| Costs during treatment per visit: Transport: _____ Food: _____ Accommodation: _____                                                                                                                                                              |                                                          |
| Total treatment _____ Riel                                                                                                                                                                                                                       |                                                          |
| <b>6.2</b> How much does your family/friend/DOT supporter earn per day?                                                                                                                                                                          | _____ Riel <input type="checkbox"/> Doesn't earn         |
| <b>6.3</b> Why did someone accompany you? (check all that apply)                                                                                                                                                                                 |                                                          |

Participant code: \_\_\_\_\_

- Distance     Security     Administrative barriers     Too ill to travel alone  
 Was required for treatment     Patient was a minor     Other (specify) \_\_\_\_\_

**7 Hospitalization Costs**

7.1 Were you hospitalized during your TB treatment? (If no go to question 8.1)  Yes  No

a If yes, how many days in total did you stay in hospital? \_\_\_\_\_ Days

7.2 How much did you pay in the hospital per day?

Bed price: \_\_\_\_\_

Food (not provided by hospital): \_\_\_\_\_ Transport (return): \_\_\_\_\_

Drugs\* \_\_\_\_\_ Tests\*\* \_\_\_\_\_ Other (specify): \_\_\_\_\_

\* Do not repeat TB drug cost described in 5.14

\*\* Do not repeat test costs described in 5.16 TOTAL: \_\_\_\_\_ Riel + administration fees: \_\_\_\_\_ Riel

7.3 Did any family/friend STAY with you while in hospital?  Yes  No

a If yes, How many days did he/she stay with you (sleep there)? \_\_\_\_\_ Days

7.4 Were there any extra costs for your family/friend for staying at the hospital?  Yes  No

Accommodation (hospital or other): \_\_\_\_\_ Food: \_\_\_\_\_

Transport: \_\_\_\_\_ Other (specify): \_\_\_\_\_ TOTAL: \_\_\_\_\_

7.5 How much does your family/friend earn per day?

\_\_\_\_\_ Riel  Doesn't earn

7.6 Did any OTHER family/friend visit you in hospital? (If no go to question 8.1)  Yes  No

a If yes, how many times of visit? \_\_\_\_\_ Times

b How much did they pay for each visit?

Accommodation (hospital or other): \_\_\_\_\_ Food: \_\_\_\_\_

Transport: \_\_\_\_\_ Other (specify): \_\_\_\_\_ TOTAL: \_\_\_\_\_ Riel

c How long were the visits including travel time? \_\_\_\_\_ minutes

**8 Other Costs Food Supplements**

8.1 Did you buy any supplements for your diet because of TB illness, for example, vitamins, meat, energy drinks, soft drinks, fruit or medicines? (If no go to question 9.1)  Yes  No

a If yes, What kind of items? (specify) (check all that apply)

Fruits  Drinks  Vitamins/Herbs  Meat  Other (specify): \_\_\_\_\_

8.2 How much did you spend on these items per month on average? \_\_\_\_\_ Riel

**9 Other Illnesses**

9.1 Do you have any chronic illness for which you are receiving treatment? (If no go to question 9.3)

Only before TB     Only after TB     Before & after TB     No

a If yes, Which? a \_\_\_\_\_ b \_\_\_\_\_ c \_\_\_\_\_

Participant code: \_\_\_\_\_

**9.2** Were there any additional costs for you because of this other illness BESIDES the costs that you have already mentioned?  Yes  No

**a** If yes, how much were these additional costs on average per month?  
Tests: \_\_\_\_\_ Drugs: \_\_\_\_\_ Food: \_\_\_\_\_ Transport: \_\_\_\_\_ Other: \_\_\_\_\_ TOTAL: \_\_\_\_\_

**9.3** How much did you spend on healthcare on average per month BEFORE the TB illness? \_\_\_\_\_ Riel

**9.4** How much do you spend on healthcare on average per month NOW? \_\_\_\_\_ Riel

**10 Reimbursement/ Equity Card**

**10.1** Do you have any kind of private or governmental health/medical insurance scheme? (If no go to question 10.2)  
 Yes  No

**a** If yes, what type?  
 Reimbursement scheme  Monthly medical allowance  Equity card ("poor card")  
 Family/community fund  Western scheme (contract)  Donor  
 Other(specify): \_\_\_\_\_

**10.2** Do you know about the equity card system in Cambodia?  Yes  No

**10.3** Have you received reimbursement for any costs related to TB treatment?\*(  
(If reimbursement for pre-diagnosis/diagnosis, use Section 4)  Yes  No

**a** How much have you received in reimbursement? \_\_\_\_\_ Riel

**11 Coping Costs**

**11.1** Did you borrow any money to cover costs due to TB illness? (If no go to question 11.2)  Yes  No

**a** If yes, how much did you borrow? \_\_\_\_\_ Riel

**b** From whom did you borrow?  Family  Neighbors/friends  Private bank  
(check all that apply)  Cooperative  Other (specify) \_\_\_\_\_

**c** What is the interest rate on the loan? (%)  
\_\_\_\_\_ %  I do not pay interest  I'm not expected to pay back the money

**11.2** Have you sold any of your property to finance the cost of TB illness?  Yes  No

If yes, what did you sell? (check all that apply)

**a**  Land  Livestock  Transport/vehicle  Household item  Farm produce  
 Other (specify)

**b** What is the estimated market value of the property you sold? \_\_\_\_\_ Riel

**c** How much did you earn from the sale of your property? \_\_\_\_\_ Riel

**12 Socioeconomic Information Individual Situation and Income**

**12.1** Who is the primary income earner in the household?  
 Patient  Wife/mother  Husband/father  Extended family  Son/daughter  
 Other (specify): \_\_\_\_\_

Participant code: \_\_\_\_\_

|                                                                                                                                                                                                                                                                                                                                                                                                                                                                                                                                                                                                                                                                                                                                                                                                                                           |
|-------------------------------------------------------------------------------------------------------------------------------------------------------------------------------------------------------------------------------------------------------------------------------------------------------------------------------------------------------------------------------------------------------------------------------------------------------------------------------------------------------------------------------------------------------------------------------------------------------------------------------------------------------------------------------------------------------------------------------------------------------------------------------------------------------------------------------------------|
| <p><b>12.2</b> What is the highest level of education of...?</p> <p><b>a</b> The patient<br/><input type="checkbox"/> Illiterate    <input type="checkbox"/> Primary    <input type="checkbox"/> Secondary    <input type="checkbox"/> Graduate/certificate    <input type="checkbox"/> Other(specify): _____</p> <p><b>b</b> The primary income earner?<br/><input type="checkbox"/> Illiterate    <input type="checkbox"/> Primary    <input type="checkbox"/> Secondary    <input type="checkbox"/> Graduate/certificate    <input type="checkbox"/> Other(specify): _____</p> <p><b>c</b> Head of household?<br/><input type="checkbox"/> Illiterate    <input type="checkbox"/> Primary    <input type="checkbox"/> Secondary    <input type="checkbox"/> Graduate/certificate    <input type="checkbox"/> Other(specify): _____</p> |
| <p><b>12.3</b> Were you formally employed before diagnosis?</p> <p><input type="checkbox"/> Yes, formal work    <input type="checkbox"/> On sick leave    <input type="checkbox"/> Schooling    <input type="checkbox"/> Housework</p> <p><input type="checkbox"/> No, informal work    <input type="checkbox"/> Retired    <input type="checkbox"/> Other(specify): _____</p>                                                                                                                                                                                                                                                                                                                                                                                                                                                            |
| <p><b>12.4</b> Were you formally employed during treatment?</p> <p><input type="checkbox"/> Yes, formal work    <input type="checkbox"/> On sick leave    <input type="checkbox"/> Schooling    <input type="checkbox"/> Housework</p> <p><input type="checkbox"/> No, informal work    <input type="checkbox"/> Retired    <input type="checkbox"/> Other(specify): _____</p> <p><b>a</b> Is the reason for not working related to TB illness?    <input type="checkbox"/> Yes    <input type="checkbox"/> No</p> <p><b>b</b> If yes, when was the last time you were working? Date (mm/yy)    _____</p>                                                                                                                                                                                                                                 |
| <p><b>12.5</b> Are you currently formally employed?</p> <p><input type="checkbox"/> Yes, formal work    <input type="checkbox"/> On sick leave    <input type="checkbox"/> Schooling    <input type="checkbox"/> Housework</p> <p><input type="checkbox"/> No, informal work    <input type="checkbox"/> Retired    <input type="checkbox"/> Other(specify): _____</p> <p><b>a</b> Is the reason for not working related to TB illness?    <input type="checkbox"/> Yes    <input type="checkbox"/> No</p> <p><b>b</b> If yes, when was the last time you were working? Date (mm/yy)    _____</p>                                                                                                                                                                                                                                         |
| <p><b>12.6</b> How are you usually paid?</p> <p><input type="checkbox"/> Cash    <input type="checkbox"/> In kind    <input type="checkbox"/> Cash and in kind    <input type="checkbox"/> Not paid</p> <p><input type="checkbox"/> Bank transferred salary    <input type="checkbox"/> Other(specify): _____</p>                                                                                                                                                                                                                                                                                                                                                                                                                                                                                                                         |
| <p><b>12.7</b> What was your personal take home earning per week on average BEFORE TB illness?<br/>(or other social support)</p> <p>_____ Riel per week    <input type="checkbox"/> Didn't earn</p>                                                                                                                                                                                                                                                                                                                                                                                                                                                                                                                                                                                                                                       |
| <p><b>12.8</b> What was your personal take home earning per week on average DURING TB illness?<br/>(includes welfare, disability, or other social support)</p> <p>_____ Riel per week    <input type="checkbox"/> Didn't earn</p> <p><b>a</b> If the answer differs from 12.7, Is the change related to TB illness?    <input type="checkbox"/> Yes    <input type="checkbox"/> No</p>                                                                                                                                                                                                                                                                                                                                                                                                                                                    |
| <p><b>12.9</b> What is your personal take home earning per week on average NOW?<br/>(includes, welfare, disability, or other social support)</p> <p>_____ Riel per week    <input type="checkbox"/> Didn't earn</p> <p><b>a</b> If the answer differs from 12.7, Is the change related to TB illness?    <input type="checkbox"/> Yes    <input type="checkbox"/> No</p>                                                                                                                                                                                                                                                                                                                                                                                                                                                                  |
| <p><b>12.10</b> Have you ever stopped working/going to school/doing housework due to TB?    <input type="checkbox"/> Yes    <input type="checkbox"/> No</p> <p><b>a</b> If yes, for how long? _____ Months</p>                                                                                                                                                                                                                                                                                                                                                                                                                                                                                                                                                                                                                            |
| <p><b>12.11</b> Did someone stay home SPECIFICALLY to take care of you due to TB?    <input type="checkbox"/> Yes    <input type="checkbox"/> No</p>                                                                                                                                                                                                                                                                                                                                                                                                                                                                                                                                                                                                                                                                                      |

Participant code: \_\_\_\_\_

a If yes, for how long? \_\_\_\_\_ Weeks

b Did they quit or reduce their income-earning job to stay home and care for you?  Yes  No

c If yes, how much did he/she lose income per weeks on average? \_\_\_\_\_ Riels

**12.12** How regularly did you work before you became ill with TB

Throughout the year  Seasonal/part of year  Day labour  Other(specify) \_\_\_\_\_

**12.13** Did you have to change jobs when you became ill with TB?  Yes  No or N/A

**12.14** What is your main occupation?

Sales/service  Farmer  Household  Production/construction worker

Student  Jobless  Public servant  Other(specify) \_\_\_\_\_

**12.15** How many hours did you work on average per day...?

a BEFORE you became ill with TB? \_\_\_\_\_ Hours

b DURING treatment? \_\_\_\_\_ Hours

c AFTER treatment? \_\_\_\_\_ Hours

**12.16** If answers different, was the change related to TB illness?  Yes  No

a If answer differs, Is someone doing the work that you used to do? (check all that apply)

Daughter  Son  Spouse  Friend  Nobody  Other family

**12.17** Do you have children of or below school age? (If no go to question 12.19)  Yes  No

**12.18** Did all of your children of school age attend school regularly during your treatment?  Yes  No

a If no, why not? Tick most appropriate

Needs to help around the house  No money for school fees  Also sick

Has to work to earn income  Other (specify) \_\_\_\_\_

b Did any of your children of or below school age work to finance costs due to TB illness?  Yes  No

**12.19** If you employed someone to do the housework for your household, how much would it cost?

a While you were sick? \_\_\_\_\_ Riel per day

b While you are healthy? \_\_\_\_\_ Riel per day

**12.20** Are you financially independent?  Yes  No

**12.21** Has TB illness affected your social or private life in any way? (check all that apply)

No  Divorce  Loss of job  Dropped out of school  Sick child

Separated from spouse/partner  Disruption of sexual life  Other (specify) \_\_\_\_\_

**12.22** Has TB illness resulted in a financial burden?  Yes  No

**13 Household Income and Spending**

**13.1** How much do you estimate was the average income of your household per month BEFORE TB illness?  
(for all persons in the house, including patient, welfare, government or social assistance)

Income patient: \_\_\_\_\_ Income rest of household: \_\_\_\_\_ Welfare payments: \_\_\_\_\_

Government assistance: \_\_\_\_\_ Other(specify): \_\_\_\_\_ TOTAL: \_\_\_\_\_ Riel

Participant code: \_\_\_\_\_

|                                                                                                                                                                                                                                                                                                                                                                                                                                                                                                                                                                                                                                                     |
|-----------------------------------------------------------------------------------------------------------------------------------------------------------------------------------------------------------------------------------------------------------------------------------------------------------------------------------------------------------------------------------------------------------------------------------------------------------------------------------------------------------------------------------------------------------------------------------------------------------------------------------------------------|
| <b>13.2</b> How much do you estimate was the average income of your household per month DURING treatment?<br>Income patient: _____ Income rest of household: _____ Welfare payments: _____<br>Government assistance: _____ Other(specify): _____ TOTAL: _____ Riel                                                                                                                                                                                                                                                                                                                                                                                  |
| <b>13.3</b> How much do you estimate was the average income of your household per month AFTER TB illness?<br>Income patient: _____ Income rest of household: _____ Welfare payments: _____<br>Government assistance: _____ Other(specify): _____ TOTAL: _____ Riel                                                                                                                                                                                                                                                                                                                                                                                  |
| <b>13.4</b> How many people regularly sleep in your house? (including patient) _____ Persons                                                                                                                                                                                                                                                                                                                                                                                                                                                                                                                                                        |
| <b>13.5</b> How many of the household members are paid for working? (include patient, and payment in kind or farm produce) _____ Persons                                                                                                                                                                                                                                                                                                                                                                                                                                                                                                            |
| <b>13.6</b> Besides yourself, did anyone else of your household receive treatment for TB? <input type="checkbox"/> Yes <input type="checkbox"/> No<br>a If yes, how many? _____ Persons                                                                                                                                                                                                                                                                                                                                                                                                                                                             |
| <b>13.7</b> How much food did your household consume every month on average BEFORE, DURING and AFTER TB illness?<br>(If home production) If the food that you consumed per month before/during/after TB illness was sold on the market: How much would it be worth? (plus how much you spent on average on food not produced at home?)<br>a BEFORE: _____ Riel<br>b DURING: _____ Riel    b2. if answer differs from a, the change is due to TB? <input type="checkbox"/> Yes <input type="checkbox"/> No<br>c AFTER: _____ Riel    c2. if answer differs from a, the change is due to TB? <input type="checkbox"/> Yes <input type="checkbox"/> No |

| 14 Socioeconomic Indicators                                                                                                                                                                                                                                                                                                                                                              |  |
|------------------------------------------------------------------------------------------------------------------------------------------------------------------------------------------------------------------------------------------------------------------------------------------------------------------------------------------------------------------------------------------|--|
| <b>14.1</b> What is your main source of drinking water?<br><input type="checkbox"/> Rainwater <input type="checkbox"/> Lake/pond/river <input type="checkbox"/> Private well/bore hole<br><input type="checkbox"/> Piped water <input type="checkbox"/> Bottled water <input type="checkbox"/> Public water supply                                                                       |  |
| <b>14.2</b> What type of toilet facility is available?<br><input type="checkbox"/> No facility/bush/field <input type="checkbox"/> Shared pit toilet <input type="checkbox"/> Own latrine <input type="checkbox"/> Flush toilet                                                                                                                                                          |  |
| <b>14.3</b> How many rooms are there in your house?<br><input type="checkbox"/> 1 room <input type="checkbox"/> 2 rooms <input type="checkbox"/> 3 rooms <input type="checkbox"/> 4 or more rooms<br>a Do you own the house or residence you live in? <input type="checkbox"/> Yes <input type="checkbox"/> No                                                                           |  |
| <b>14.4</b> Do you own? Tick all that apply<br><input type="checkbox"/> Radio <input type="checkbox"/> Television <input type="checkbox"/> Mobile phone <input type="checkbox"/> Non-mobile phone <input type="checkbox"/> Fridge<br><input type="checkbox"/> Wardrobe <input type="checkbox"/> Sewing machine <input type="checkbox"/> CD/DVD player <input type="checkbox"/> Generator |  |
| <b>14.5</b> If the government could provide you with some service to ease the burden of TB on you and your household, what would you prefer to have? Choose only one<br><input type="checkbox"/> Transport voucher <input type="checkbox"/> Food voucher <input type="checkbox"/> More efficient service<br><input type="checkbox"/> Other (specify): _____                              |  |
| <b>14.6</b> How much would you be willing to pay for not becoming ill with TB in the first place?                                                                                                                                                                                                                                                                                        |  |



Participant code: \_\_\_\_\_

Less than \$20

\$20-50

\$51-100

More than \$100

**Comments of interviewer**

**Signature**

About how much did you spend for each of these visits before you were diagnosed with TB, including the visit when you actually received your diagnosis?\*

For all that don't apply, mark N/A. Fill one line per visit. Fill in chronological order.

| Visit | A                 | B                | C             | D                                                           | E                                     | F                                            | G                                                                   | H                            | I                         | J                  | K                                            | L                         | M                       |
|-------|-------------------|------------------|---------------|-------------------------------------------------------------|---------------------------------------|----------------------------------------------|---------------------------------------------------------------------|------------------------------|---------------------------|--------------------|----------------------------------------------|---------------------------|-------------------------|
|       | Type of provider* | Date of visit*** | Distance (Km) | Total Time Spent per visit (in hours, includes travel time) | Admin Cost/ Consultative registration | Test Cost (for sputum or other except x-ray) | X-ray Costs (includes sending x-rays to radiologist, travel & fees) | Drug Costs (all kinds total) | Travel Costs (round trip) | Food Costs (total) | Accommodation/ hospitalization Costs (total) | Sub-Total Costs per visit | insurance Reimbursement |
| 1     |                   |                  |               | T:                                                          |                                       |                                              |                                                                     |                              | Pt:                       | Pt:                | Pt:                                          | Pt:                       |                         |
|       |                   |                  |               | O:                                                          |                                       |                                              |                                                                     |                              | G                         | G                  | G                                            | G                         |                         |
| 2     |                   |                  |               | T:                                                          |                                       |                                              |                                                                     |                              | Pt:                       | Pt:                | Pt:                                          | Pt:                       |                         |
|       |                   |                  |               | O:                                                          |                                       |                                              |                                                                     |                              | G                         | G                  | G                                            | G                         |                         |
| 3     |                   |                  |               | T:                                                          |                                       |                                              |                                                                     |                              | Pt:                       | Pt:                | Pt:                                          | Pt:                       |                         |
|       |                   |                  |               | O:                                                          |                                       |                                              |                                                                     |                              | G                         | G                  | G                                            | G                         |                         |
| 4     |                   |                  |               | T:                                                          |                                       |                                              |                                                                     |                              | Pt:                       | Pt:                | Pt:                                          | Pt:                       |                         |
|       |                   |                  |               | O:                                                          |                                       |                                              |                                                                     |                              | G                         | G                  | G                                            | G                         |                         |
| 5     |                   |                  |               | T:                                                          |                                       |                                              |                                                                     |                              | Pt:                       | Pt:                | Pt:                                          | Pt:                       |                         |
|       |                   |                  |               | O:                                                          |                                       |                                              |                                                                     |                              | G                         | G                  | G                                            | G                         |                         |
| 6     |                   |                  |               | T:                                                          |                                       |                                              |                                                                     |                              | Pt:                       | Pt:                | Pt:                                          | Pt:                       |                         |
|       |                   |                  |               | O:                                                          |                                       |                                              |                                                                     |                              | G                         | G                  | G                                            | G                         |                         |
| 7     |                   |                  |               | T:                                                          |                                       |                                              |                                                                     |                              | Pt:                       | Pt:                | Pt:                                          | Pt:                       |                         |
|       |                   |                  |               | O:                                                          |                                       |                                              |                                                                     |                              | G                         | G                  | G                                            | G                         |                         |

|                                                                                   |  |  |  |    |  |  |  |  |     |     |      |     |  |
|-----------------------------------------------------------------------------------|--|--|--|----|--|--|--|--|-----|-----|------|-----|--|
| 8                                                                                 |  |  |  | T: |  |  |  |  | Pt: | Pt: | Pt:  | Pt: |  |
|                                                                                   |  |  |  | O: |  |  |  |  | G   | G   | G    | G   |  |
| 9                                                                                 |  |  |  | T: |  |  |  |  | Pt: | Pt: | Pt:  | Pt: |  |
|                                                                                   |  |  |  | O: |  |  |  |  | G   | G   | G    | G   |  |
| Total Direct Prediagnosis and Diagnostic costs (sum sub-totals) minus insurance = |  |  |  |    |  |  |  |  |     |     | Riel |     |  |

\* This includes travel to ACF camp as well (If ACF patient, select "6" for "Type of provider")

\*\* 1, Government hospital 2, Health center 3, Private hospital/clinic 4, Pharmacy, drug & grocery store

5, Traditional healer 6, Community-based TB screening (ACF) 7, Others (specify in the box)

\*\*\* This is very important for this reserach.
