# Supplementary material for: Mitigating Financial Burden of Tuberculosis through Active Case Finding Targeting Household and Neighbourhood Contacts in Cambodia
Source: PubMed Central journal article supplement (PMC5017748; doi:10.1371/journal.pone.0162796), 2016-09-09
Supplement: pone.0162796.s002.pdf [file pone.0162796.s002.pdf]

លេខកូដអ្នកចូលរួម: \_\_\_\_\_

| 1 ព័ត៌មានទូទៅ                   |                                                                                                     |
|---------------------------------|-----------------------------------------------------------------------------------------------------|
| 1.1 ឈ្មោះអ្នកសម្ភាសន៍           | <input type="checkbox"/> ចំរើន <input type="checkbox"/> ហ្វានីតា <input type="checkbox"/> ហ្វារ៉ាមី |
| 1.2 កាលបរិច្ឆេទ (ថ្ងៃ ខែ ឆ្នាំ) |                                                                                                     |
| 1.3 ភូមិ                        |                                                                                                     |
| 1.4 មណ្ឌលសុខភាព                 |                                                                                                     |
| 1.5 ស្រុកប្រតិបត្តិ             |                                                                                                     |

| 2 ព័ត៌មានអំពីអ្នកជំងឺ<br>(ត្រូវបំពេញដោយអ្នកសម្ភាសន៍ដោយមានជំនួយពី TB & Lab register)                                                                                    |                                                                                                                                                                                                                                                                                       |
|------------------------------------------------------------------------------------------------------------------------------------------------------------------------|---------------------------------------------------------------------------------------------------------------------------------------------------------------------------------------------------------------------------------------------------------------------------------------|
| 2.1 ភេទ <input type="checkbox"/> ប្រុស <input type="checkbox"/> ស្រី                                                                                                   | 2.2 អាយុអ្នកជំងឺ _____                                                                                                                                                                                                                                                                |
| 2.3 ប្រភេទជំងឺរបេង                                                                                                                                                     | <input type="checkbox"/> មានមេរោគ (b+) <input type="checkbox"/> គ្មានមេរោគ (b-)                                                                                                                                                                                                       |
| 2.4 រយៈពេលព្យាបាលសរុប                                                                                                                                                  | <input type="checkbox"/> ៦ ខែ <input type="checkbox"/> ៨ ខែ <input type="checkbox"/> ផ្សេងៗ (បញ្ជាក់): _____                                                                                                                                                                          |
| 2.5 វិធីសាស្ត្រព្យាបាល                                                                                                                                                 | <input type="checkbox"/> របេងក្នុងសូតរកឃើញថ្មី <input type="checkbox"/> ការព្យាបាលសារឡើងវិញ                                                                                                                                                                                           |
| 2.6 អ្នកផ្តល់សម្ភាសន៍                                                                                                                                                  | <input type="checkbox"/> អ្នកជំងឺ <input type="checkbox"/> ប្រសិនបើអាណាព្យាបាល... <input type="checkbox"/> ឪពុកម្តាយ <input type="checkbox"/> គ្រួសារសាច់ឆ្ងាយ<br><input type="checkbox"/> អាណាព្យាបាល <input type="checkbox"/> យាយតា <input type="checkbox"/> ផ្សេងៗ(បញ្ជាក់): _____ |
| 2.7 ស្ថានភាពជំងឺអេដស៍<br>(ប្រសិនបើមានប៉ុណ្ណោះ)                                                                                                                         | <input type="checkbox"/> វិជ្ជមាន <input type="checkbox"/> អវិជ្ជមាន <input type="checkbox"/> ពុំបានធ្វើតេស្ត <input type="checkbox"/> មិនដឹង<br><input type="checkbox"/> បដិសេធ                                                                                                      |
| 2.8 ប្រភេទអ្នកចូលរួម                                                                                                                                                   |                                                                                                                                                                                                                                                                                       |
| ក1 <input type="checkbox"/> ACF (គ្រួសារ ឬ អ្នកជិតខាងដែលបានជ្រើសរើស)                                                                                                   | ខ1 <input type="checkbox"/> PCF                                                                                                                                                                                                                                                       |
| ក2 លេខចុះឈ្មោះនៅ HC:                                                                                                                                                   | ខ2 លេខចុះឈ្មោះនៅ HC:                                                                                                                                                                                                                                                                  |
| ក3 លេខចុះឈ្មោះនៅ OD:                                                                                                                                                   | ខ3 លេខចុះឈ្មោះនៅ OD:                                                                                                                                                                                                                                                                  |
|                                                                                                                                                                        | (ថ្ងៃ ខែ ឆ្នាំ)                                                                                                                                                                                                                                                                       |
| ក4 កាលបរិច្ឆេទទទួលព័ត៌មាន ACF                                                                                                                                          | ខ4 កាលបរិច្ឆេទពិនិត្យឡាម                                                                                                                                                                                                                                                              |
| ក5 កាលបរិច្ឆេទនៃវគ្គ ACF                                                                                                                                               | ខ5 កាលបរិច្ឆេទលទ្ធផល Xray                                                                                                                                                                                                                                                             |
| ក6 កាលបរិច្ឆេទចុះឈ្មោះនៅ HC                                                                                                                                            | ខ6 កាលបរិច្ឆេទចុះឈ្មោះនៅ HC                                                                                                                                                                                                                                                           |
| ក7 កាលបរិច្ឆេទចាប់ផ្តើមការព្យាបាល                                                                                                                                      | ខ7 កាលបរិច្ឆេទចាប់ផ្តើមការព្យាបាល                                                                                                                                                                                                                                                     |
| ក8 កាលបរិច្ឆេទបញ្ចប់ការព្យាបាល                                                                                                                                         | ខ8 កាលបរិច្ឆេទបញ្ចប់ការព្យាបាល                                                                                                                                                                                                                                                        |
| 2.9 ស្ថានភាពគ្រួសារ <input type="checkbox"/> រៀបការ <input type="checkbox"/> នៅលីវ <input type="checkbox"/> លែងលះ/រស់នៅបែកគ្នា <input type="checkbox"/> ពោះម៉ាយ/មេម៉ាយ |                                                                                                                                                                                                                                                                                       |
| 2.10 ទីលំនៅ                                                                                                                                                            | <input type="checkbox"/> ទីក្រុង <input type="checkbox"/> ជ្វាយក្រុង <input type="checkbox"/> ជនបទ <input type="checkbox"/> គ្មានផ្ទះសម្បែង/អីទីលំនៅ                                                                                                                                  |
| 2.11 លេខទូរសព្ទនាក់ជំងឺ                                                                                                                                                |                                                                                                                                                                                                                                                                                       |

| 3 ការស្វែងរកសេវាសុខភាព                                                                         |
|------------------------------------------------------------------------------------------------|
| 3.1 តើអ្នកមានរោគសញ្ញាជំងឺរបេងណាមួយទេ មុនពេលធ្វើរោគវិនិច្ឆ័យ? (ប្រសិនបើគ្មានសូមបន្តទៅសំណួរ 3.3) |

លេខកូដអ្នកចូលរួម: \_\_\_\_\_

|                                                                               | <input type="checkbox"/> មាន | <input type="checkbox"/> គ្មាន | <input type="checkbox"/> អត់មាន | <input type="checkbox"/> មិនដឹង | ពេលចាប់ផ្តើមមានរោគសញ្ញា  | (ថ្ងៃ ខែ ឆ្នាំ) |
|-------------------------------------------------------------------------------|------------------------------|--------------------------------|---------------------------------|---------------------------------|--------------------------|-----------------|
| 3.2 តើរយៈពេលយូរប៉ុណ្ណាដែលអ្នកមានរោគសញ្ញានោះ នៅមុនពេលចាប់ផ្តើមព្យាបាលជំងឺរបេង? |                              |                                |                                 |                                 |                          |                 |
| ក្អក                                                                          | <input type="checkbox"/>     | <input type="checkbox"/>       | <input type="checkbox"/>        | <input type="checkbox"/>        | ថ្ងៃចាប់ផ្តើមមានរោគសញ្ញា | _____           |
| ក្អកធ្លាក់ឈាម                                                                 | <input type="checkbox"/>     | <input type="checkbox"/>       | <input type="checkbox"/>        | <input type="checkbox"/>        | ថ្ងៃចាប់ផ្តើមមានរោគសញ្ញា | _____           |
| មានកំហាក                                                                      | <input type="checkbox"/>     | <input type="checkbox"/>       | <input type="checkbox"/>        | <input type="checkbox"/>        | ថ្ងៃចាប់ផ្តើមមានរោគសញ្ញា | _____           |
| បែកញើសពេលយប់                                                                  | <input type="checkbox"/>     | <input type="checkbox"/>       | <input type="checkbox"/>        | <input type="checkbox"/>        | ថ្ងៃចាប់ផ្តើមមានរោគសញ្ញា | _____           |
| ស្រកទម្ងន់                                                                    | <input type="checkbox"/>     | <input type="checkbox"/>       | <input type="checkbox"/>        | <input type="checkbox"/>        | ថ្ងៃចាប់ផ្តើមមានរោគសញ្ញា | _____           |
| ឈឺទ្រូង                                                                       | <input type="checkbox"/>     | <input type="checkbox"/>       | <input type="checkbox"/>        | <input type="checkbox"/>        | ថ្ងៃចាប់ផ្តើមមានរោគសញ្ញា | _____           |
| អស់កម្លាំង                                                                    | <input type="checkbox"/>     | <input type="checkbox"/>       | <input type="checkbox"/>        | <input type="checkbox"/>        | ថ្ងៃចាប់ផ្តើមមានរោគសញ្ញា | _____           |
| គ្រុនក្តៅ                                                                     | <input type="checkbox"/>     | <input type="checkbox"/>       | <input type="checkbox"/>        | <input type="checkbox"/>        | ថ្ងៃចាប់ផ្តើមមានរោគសញ្ញា | _____           |
| ផ្សេងទៀត ៖ _____                                                              | <input type="checkbox"/>     | <input type="checkbox"/>       | <input type="checkbox"/>        | <input type="checkbox"/>        | ថ្ងៃចាប់ផ្តើមមានរោគសញ្ញា | _____           |
| (បញ្ជាក់)                                                                     |                              |                                |                                 |                                 |                          |                 |

3.3 តើអ្នកបានស្វែងរកការព្យាបាល ឬ ជំនួយនានាអំពីរោគសញ្ញាទាំងនេះ នៅតាមកន្លែងដូចខាងក្រោមដែរឬទេ?  
(គូសទាំងអស់ប្រសិនបើមាន)

តើកន្លែងណាដែលអ្នកទៅដំបូងគេ? (គូសរង្វង់នៅកន្លែងដំបូងគេ ដែលអ្នកទៅរកការព្យាបាល)

|                   |                          |         |                          |    |                           |                          |         |                          |    |
|-------------------|--------------------------|---------|--------------------------|----|---------------------------|--------------------------|---------|--------------------------|----|
| ពេទ្យរដ្ឋ         | <input type="checkbox"/> | បាទ/ចាស | <input type="checkbox"/> | ទេ | មណ្ឌលសុខភាព               | <input type="checkbox"/> | បាទ/ចាស | <input type="checkbox"/> | ទេ |
| ពេទ្យឯកជន/គ្លីនិក | <input type="checkbox"/> | បាទ/ចាស | <input type="checkbox"/> | ទេ | ឱសថស្ថាន, កន្លែងលក់ថ្នាំ  | <input type="checkbox"/> | បាទ/ចាស | <input type="checkbox"/> | ទេ |
| ពេទ្យបូរណ         | <input type="checkbox"/> | បាទ/ចាស | <input type="checkbox"/> | ទេ | ផ្សេងទៀត (បញ្ជាក់)៖ _____ | <input type="checkbox"/> | បាទ/ចាស | <input type="checkbox"/> | ទេ |

3.4 តើអាគារសុខាភិបាលដែលនៅក្បែរអ្នកបំផុតមានចម្ងាយប៉ុន្មាន?

|                                    |       |            |       |            |       |              |
|------------------------------------|-------|------------|-------|------------|-------|--------------|
| ក ពេលធ្វើរោគវិនិច្ឆ័យ & ព្យាបាល TB | _____ | ដើរ (នាទី) | _____ | ជិះ (នាទី) | _____ | ចម្ងាយ (គ.ម) |
| ខ សម្រាប់តែពេលព្យាបាល TB           | _____ | ដើរ (នាទី) | _____ | ជិះ (នាទី) | _____ | ចម្ងាយ (គ.ម) |

ផ្នែកទី ៤៖ សូមបំពេញលើតារាងដោយឡែក និងផ្តល់ព័ត៌មានអំពីការចំណាយមុន និង ពេលធ្វើរោគវិនិច្ឆ័យ?

| 5 ការចំណាយលើការព្យាបាល                                           |                                                                                                                                                                                            |
|------------------------------------------------------------------|--------------------------------------------------------------------------------------------------------------------------------------------------------------------------------------------|
| <b>ការចំណាយពាក់ព័ន្ធនឹង DOT</b>                                  |                                                                                                                                                                                            |
| 5.1 តើអ្នកទៅយកថ្នាំ TB នៅកន្លែងណា?                               | <input type="checkbox"/> អាគារសុខាភិបាល/មន្ទីរពេទ្យ <input type="checkbox"/> ផ្ទះ <input type="checkbox"/> សហគមន៍ <input type="checkbox"/> កន្លែងធ្វើការ <input type="checkbox"/> ឱសថស្ថាន |
| 5.2 ក. តើអ្នកត្រូវទៅទីនោះដើម្បីយកថ្នាំប៉ុន្មានដងក្នុងមួយសប្តាហ៍? | _____ ដង/សប្តាហ៍                                                                                                                                                                           |
| ខ. តើកំឡុងពេលប៉ុន្មានសប្តាហ៍ដែលអ្នកទៅទីនោះ?                      | _____ សប្តាហ៍                                                                                                                                                                              |
| 5.3 តើអ្នកត្រូវចំណាយពេលប៉ុន្មានដើម្បីទៅកាន់ទីនោះ? (តែទៅប៉ុណ្ណោះ) | _____ ដើរ (នាទី)   _____ ជិះ (នាទី)   _____ ផ្សេងទៀត (បញ្ជាក់)៖ _____                                                                                                                      |

លេខកូដអ្នកចូលរួម: \_\_\_\_\_

5.4 តើត្រូវចំណាយពេលជាមធ្យមប៉ុន្មានដើម្បីធ្វើដំណើរទៅកាន់ទីនោះដោយគិតទាំងរយៈពេលធ្វើដំណើរ និង រង់ចាំ?  
\_\_\_\_\_ នាទី

5.5 ពីផ្ទះរបស់អ្នកទៅកាន់កន្លែង DOT (ដូចមានក្នុង 5.1), តើអ្នកត្រូវចំណាយប្រាក់ប៉ុន្មានប្រសិនបើអ្នកជិះ?  
(ទាំងទៅនិងមក) \_\_\_\_\_ រៀល

5.6 តើត្រូវចំណាយប្រាក់ប៉ុន្មានសម្រាប់ការហូបចុកពេលធ្វើដំណើរតាមផ្លូវ ការរង់ចាំ & អាហារថ្ងៃត្រង់?  
\_\_\_\_\_ រៀល

**ការចំណាយពាក់ព័ន្ធនឹងការ ័ទៅយកថ្នាំរបេង & ័ដឹកជញ្ជូនថ្នាំរបេង**

5.7 ក. តើអ្នកធ្វើដំណើរទៅអាគារសុខាភិបាល/មន្ទីរពេទ្យដើម្បីយកថ្នាំរបេងញឹកញាប់ប៉ុណ្ណា? \_\_\_\_\_ ដង/ខែ  
ខ. តើកំឡុងពេលប៉ុន្មានខែដែលអ្នកទៅយកថ្នាំរបេង? \_\_\_\_\_ ខែ

5.8 តើត្រូវចំណាយពេលយូរប៉ុណ្ណាសម្រាប់ការធ្វើដំណើរទៅកាន់ទីនោះ? (តែទៅប៉ុណ្ណោះ)  
\_\_\_\_\_ ដើរ (នាទី) \_\_\_\_\_ ជិះ (នាទី) \_\_\_\_\_ ផ្សេងទៀត (បញ្ជាក់): \_\_\_\_\_

5.9 តើការទៅកាន់ទីកន្លែងនោះ ត្រូវចំណាយពេលជាមធ្យមប៉ុន្មាន គិតទាំងការធ្វើដំណើរ និងការរង់ចាំ?  
\_\_\_\_\_ នាទី

5.10 ពីផ្ទះរបស់អ្នកទៅកាន់អាគារសុខាភិបាល តើត្រូវចំណាយប្រាក់ប៉ុន្មានប្រសិនបើអ្នកជិះ? (ទាំងទៅនិងមក)  
\_\_\_\_\_ រៀល

5.11 ប្រសិនបើអ្នកទៅអាគារសុខាភិបាលដើម្បីយកថ្នាំរបេង តើអ្នកត្រូវចំណាយប្រាក់ប៉ុន្មានសម្រាប់ការហូបចុកពេល  
ធ្វើដំណើរតាមផ្លូវ ការរង់ចាំ & អាហារថ្ងៃត្រង់ ? \_\_\_\_\_ រៀល

5.12 តើអ្នកត្រូវបង់ថ្លៃរដ្ឋបាល ឬ ថ្លៃដឹកជញ្ជូន ឬទេ នៅពេលអ្នកយកថ្នាំរបេង ?  បាទ/ចាស  ទេ  
ក ប្រសិនបើបង់ ប៉ុន្មាន? \_\_\_\_\_ រៀល

5.13 តើអ្នកត្រូវចំណាយលើការស្នាក់នៅទេ នៅពេលយកថ្នាំរបេង?  បាទ/ចាស  ទេ  
ក ប្រសិនបើចំណាយ ប៉ុន្មាន? \_\_\_\_\_ រៀល

5.14 តើអ្នកបានចំណាយប្រាក់ដើម្បីទិញថ្នាំរបេងដែរឬទេ?  បាទ/ចាស  ទេ  
ក ប្រសិនបើបានបង់ ប៉ុន្មាន? \_\_\_\_\_ រៀល

**ការចំណាយពាក់ព័ន្ធនឹងការធ្វើតេស្តតាមដាន**

5.15 តើអ្នកធ្លាប់បានទៅអាគារសុខាភិបាលដែរឬទេបន្ថែមលើការណាត់ជួបជាទៀងទាត់ដើម្បីធ្វើតេស្តតាមដានដោយចាប់  
តាំងពីពេលចាប់ផ្តើមការព្យាបាល? (ប្រសិនបើអត់ទេ សូមបន្តទៅសំណួរ 6.1)  បាទ/ចាស  ទេ  
ក ប្រសិនបើធ្លាប់ ប៉ុន្មានដង? \_\_\_\_\_ ដង

5.16 ប្រសិនបើធ្លាប់ តើត្រូវចំណាយប្រាក់បន្ថែមទៀតដែរឬទេ នៅពេលដែលអ្នកទៅកាន់ទីនោះ?  បាទ/ចាស  ទេ  
ក ប្រសិនបើដូច្នោះមែន តើត្រូវចំណាយលើអ្វី ហើយចំណាយប៉ុន្មានសម្រាប់ការទៅមួយលើក?

លេខកូដអ្នកចូលរួម: \_\_\_\_\_

|                     |                  |              |
|---------------------|------------------|--------------|
| តំលៃចុះឈ្មោះ: _____ | តេស្តកំហាក _____ | X-ray: _____ |
| ផ្សេងទៀត _____      | _____            | សរុប: _____  |

**5.17** ចំពោះការតាមដាននេះ តើត្រូវចំណាយពេលជាមធ្យមប៉ុន្មាន គិតទាំងពេលធ្វើដំណើរ ការរង់ចាំ និង ការធ្វើតេស្ត?  
(ទាំងទៅ និង មក) \_\_\_\_\_ នាទី

**5.18** តើជាមធ្យមអ្នកត្រូវចំណាយប្រាក់ប៉ុន្មាន សម្រាប់ការធ្វើដំណើរ ហូបចុក ការស្នាក់នៅ ពេលដែលទៅមួយលើក?  
ការធ្វើដំណើរ \_\_\_\_\_ ចំណីអាហារ \_\_\_\_\_ ការស្នាក់នៅ \_\_\_\_\_

| 6          | ការចំណាយសម្រាប់អ្នករួមដំណើរ                                                                                                                                                                                                                                                                                                                                                            |
|------------|----------------------------------------------------------------------------------------------------------------------------------------------------------------------------------------------------------------------------------------------------------------------------------------------------------------------------------------------------------------------------------------|
| <b>6.1</b> | បើមានសមាជិកគ្រួសារ/មិត្តភក្តិ/អ្នកជំនួយផ្នែក DOT ណាម្នាក់ ជូនអ្នកទៅកន្លែងព្យាបាលរបេង/ការធ្វើតេស្តតាមដាន /ការទៅលើកយកថ្នាំរបេង/និងទៅកន្លែងDOT តើអ្នកត្រូវចំណាយលុយបន្ថែមដែរឬទេ?<br>(ប្រសិនបើគ្មាន សូមបន្តទៅសំណួរ 7.1) <input type="checkbox"/> បាទ/ចាស <input type="checkbox"/> ទេ                                                                                                        |
| <b>a</b>   | ប្រសិនបើមាន តើសមាជិកគ្រួសារ/ មិត្តភក្តិ / អ្នកជំនួយផ្នែក DOT បានជូនអ្នកទៅ ប៉ុន្មានលើក?<br>ការព្យាបាល/ការទៅដើម្បីតាមដាន _____ ដង<br>ការចំណាយក្នុងការព្យាបាលមួយលើក ការធ្វើដំណើរ: _____ អាហារ: _____<br>ការស្នាក់នៅ: _____ ចំណាយព្យាបាលសរុប: _____ រៀល                                                                                                                                    |
| <b>6.2</b> | តើសមាជិកគ្រួសារ/មិត្តភក្តិ/អ្នកជំនួយផ្នែក DOT រកបានប៉ុន្មានក្នុងមួយថ្ងៃ?<br>_____ រៀល <input type="checkbox"/> គ្មានចំណូល                                                                                                                                                                                                                                                              |
| <b>6.3</b> | ហេតុអ្វីបានជាមានអ្នកទៅជាមួយអ្នក? (គូសទាំងអស់ប្រសិនបើមាន)<br><input type="checkbox"/> ផ្លូវឆ្ងាយ <input type="checkbox"/> សុវត្ថិភាព <input type="checkbox"/> ឧបសគ្គផ្នែករដ្ឋបាល <input type="checkbox"/> ឈឺខ្លាំងពេកទៅម្នាក់ឯងមិនរួច<br><input type="checkbox"/> ការព្យាបាលតម្រូវដូច្នោះ <input type="checkbox"/> អ្នកជំងឺជាអនីតិជន <input type="checkbox"/> ផ្សេងទៀត (បញ្ជាក់): _____ |

| 7                                                                                                                                | ការចំណាយសម្រាប់ការសម្រាកពេទ្យ                                                                                                                                                                         |
|----------------------------------------------------------------------------------------------------------------------------------|-------------------------------------------------------------------------------------------------------------------------------------------------------------------------------------------------------|
| <b>7.1</b>                                                                                                                       | តើអ្នកបានសម្រាកពេទ្យទេ ក្នុងពេលព្យាបាលជំងឺរបេង? (ប្រសិនបើអត់ សូមបន្តសំណួរ 8.1) <input type="checkbox"/> បាទ/ចាស <input type="checkbox"/> ទេ                                                           |
| <b>ក</b>                                                                                                                         | ប្រសិនបើបានសម្រាកពេទ្យ តើអ្នកសម្រាកនៅពេទ្យប៉ុន្មានថ្ងៃ? _____ ថ្ងៃ                                                                                                                                    |
| <b>7.2</b>                                                                                                                       | តើអ្នកត្រូវចំណាយប៉ុន្មាន ក្នុងការសម្រាកពេទ្យមួយថ្ងៃ?<br>ថ្លៃគ្រែ _____<br>អាហារ (មិនមែនផ្តល់ដោយមន្ទីរពេទ្យ): _____ ថ្លៃធ្វើដំណើរ (ទៅមក) _____<br>ថ្នាំ* _____ តេស្ត** _____ ផ្សេងទៀត (បញ្ជាក់): _____ |
| * កុំបន្ថែមលើថ្លៃថ្នាំរបេងដូចមានក្នុងសំណួរ 5.14                                                                                  |                                                                                                                                                                                                       |
| ** កុំបន្ថែមលើថ្លៃធ្វើតេស្តដែរ មានក្នុងសំណួរ 5.16 <span style="margin-left: 100px;">សរុប: _____ រៀល</span> + តំលៃចុះឈ្មោះ: _____ |                                                                                                                                                                                                       |

លេខកូដអ្នកចូលរួម: \_\_\_\_\_

|            |                                                                                                 |                                  |                                         |
|------------|-------------------------------------------------------------------------------------------------|----------------------------------|-----------------------------------------|
| <b>7.3</b> | តើមានសមាជិកគ្រួសារ/មិត្តភក្តិណាម្នាក់បានស្នាក់នៅពេទ្យជាមួយអ្នកទេ?                               | <input type="checkbox"/> បាទ/ចាស | <input type="checkbox"/> ទេ             |
| <b>ក</b>   | ប្រសិនបើបានស្នាក់នៅ តើគេស្នាក់នៅជាមួយអ្នកបានប៉ុន្មានថ្ងៃ (គេនៅទីនោះ)?                           | _____                            | ថ្ងៃ                                    |
| <b>7.4</b> | តើអ្នកត្រូវចំណាយប្រាក់បន្ថែមទេ នៅពេលសមាជិកគ្រួសារ/មិត្តភក្តិទៅកំដរអ្នកនៅពេទ្យ?                  | <input type="checkbox"/> បាទ/ចាស | <input type="checkbox"/> ទេ             |
|            | ការស្នាក់នៅ (មន្ទីរពេទ្យ ឬកន្លែងផ្សេងៗ)៖ _____                                                  | អាហារ៖ _____                     |                                         |
|            | ការធ្វើដំណើរ៖ _____                                                                             | ផ្សេងទៀត (បញ្ជាក់)៖ _____        | សរុប៖ _____                             |
| <b>7.5</b> | តើសមាជិកគ្រួសារ/មិត្តភក្តិរកប្រាក់បានប៉ុន្មានក្នុងមួយថ្ងៃ?                                      | _____                            | រៀល <input type="checkbox"/> គ្មានចំណូល |
| <b>7.6</b> | តើមានសមាជិកគ្រួសារ/មិត្តភក្តិណាម្នាក់ផ្សេងទៀតទៅសួរសុខទុក្ខអ្នក នៅមន្ទីរពេទ្យឬដែរទេ?             | <input type="checkbox"/> មាន     | <input type="checkbox"/> អត់            |
|            | (ប្រសិនបើគ្មានសូមបន្តទៅសំណួរ 8.1)                                                               |                                  |                                         |
| <b>ក</b>   | ប្រសិនបើមាន តើសមាជិកគ្រួសារ/មិត្តភក្តិអ្នក ទៅសួរសុខទុក្ខអ្នក ប៉ុន្មានដង?                        | _____                            | ដង                                      |
| <b>ខ</b>   | តើសមាជិកគ្រួសារ/មិត្តភក្តិណាម្នាក់ផ្សេងទៀត ត្រូវចំណាយលុយប៉ុន្មានក្នុងការទៅសួរសុខទុក្ខអ្នកម្តងៗ? |                                  |                                         |
|            | ការស្នាក់នៅ (មន្ទីរពេទ្យ ឬកន្លែងផ្សេងៗ)៖ _____                                                  | អាហារ៖ _____                     |                                         |
|            | ការធ្វើដំណើរ៖ _____                                                                             | ផ្សេងទៀត (បញ្ជាក់)៖ _____        | សរុប៖ _____ រៀល                         |
| <b>គ</b>   | តើការសួរសុខទុក្ខ មានរយៈពេលប៉ុន្មាន គិតទាំងពេលធ្វើដំណើរ?                                         | _____                            | នាទី                                    |

|            |                                                                                                                                                                                             |                                  |                             |
|------------|---------------------------------------------------------------------------------------------------------------------------------------------------------------------------------------------|----------------------------------|-----------------------------|
| <b>8</b>   | <b>ការចំណាយផ្សេងទៀតសម្រាប់អាហារបន្ថែម</b>                                                                                                                                                   |                                  |                             |
| <b>8.1</b> | ដោយសារមានជំងឺរបេង តើអ្នកបានទិញអាហារបំប៉នបន្ថែមដែរឬទេ ដូចជា វីតាមីន សាច់ ភេសជ្ជៈបង្កើនថាមពល ភេសជ្ជៈគ្មានជាតិអាល់កុល ផ្លែឈើ និងថ្នាំផ្សេងៗ (ប្រសិនបើគ្មាន សូមបន្តទៅសំណួរ 9.1)                 | <input type="checkbox"/> បាទ/ចាស | <input type="checkbox"/> ទេ |
| <b>ក</b>   | ប្រសិនបើមាន តើមុខទំនិញណាមួយ? (បញ្ជាក់) (គូសទាំងអស់ ប្រសិនបើមាន)                                                                                                                             |                                  |                             |
|            | <input type="checkbox"/> ផ្លែឈើ <input type="checkbox"/> ភេសជ្ជៈ <input type="checkbox"/> វីតាមីន/ថ្នាំបូរណ <input type="checkbox"/> សាច់ <input type="checkbox"/> ផ្សេងទៀត (បញ្ជាក់) _____ |                                  |                             |
| <b>8.2</b> | ជាមធ្យម តើអ្នកត្រូវចំណាយប៉ុន្មានលើមុខទំនិញទាំងនេះ ក្នុងមួយខែ?                                                                                                                               | _____                            | រៀល                         |

|            |                                                                                                                                                                                               |                                  |                             |
|------------|-----------------------------------------------------------------------------------------------------------------------------------------------------------------------------------------------|----------------------------------|-----------------------------|
| <b>9</b>   | <b>ជំងឺផ្សេងទៀត</b>                                                                                                                                                                           |                                  |                             |
| <b>9.1</b> | តើអ្នកមានជំងឺរ៉ាំរ៉ៃណាមួយដែលទទួលការព្យាបាលទេ? (ប្រសិនបើគ្មាន សូមបន្តទៅសំណួរ 9.3)                                                                                                              |                                  |                             |
|            | <input type="checkbox"/> មុនពេលធ្វើពេទ្យវិនិច្ឆ័យTB <input type="checkbox"/> ក្រោយពេលធ្វើពេទ្យវិនិច្ឆ័យTB <input type="checkbox"/> មុន&ក្រោយធ្វើពេទ្យវិនិច្ឆ័យTB <input type="checkbox"/> អត់ |                                  |                             |
|            | បើមាន ជំងឺអ្វី? <b>ក</b> _____ <b>ខ</b> _____ <b>គ</b> _____                                                                                                                                  |                                  |                             |
| <b>9.2</b> | តើអ្នកត្រូវចំណាយអ្វី បន្ថែមសម្រាប់ជំងឺទាំងនេះដែរឬទេ?                                                                                                                                          | <input type="checkbox"/> បាទ/ចាស | <input type="checkbox"/> ទេ |
| <b>ក</b>   | ប្រសិនបើត្រូវចំណាយ តើត្រូវចំណាយប៉ុន្មានជាមធ្យម ក្នុងមួយខែ?                                                                                                                                    |                                  |                             |
|            | គេស្តុ _____ ថ្នាំ _____ អាហារ _____                                                                                                                                                          |                                  |                             |

លេខកូដអ្នកចូលរួម: \_\_\_\_\_

|                                                                                  |                |             |           |
|----------------------------------------------------------------------------------|----------------|-------------|-----------|
| ការធ្វើដំណើរ _____                                                               | ផ្សេងទៀត _____ | សរុប៖ _____ | រៀល _____ |
| 9.3 តើជាមធ្យមអ្នកត្រូវចំណាយលើការថែទាំសុខភាពប៉ុន្មានក្នុងមួយខែ មុនពេលមានជំងឺរបេង? |                |             | រៀល _____ |
| 9.4 តើបច្ចុប្បន្ន អ្នកត្រូវចំណាយលើការថែទាំសុខភាពជាមធ្យមប៉ុន្មានក្នុងមួយខែ ?      |                |             | រៀល _____ |

|                                                                                                                                                                                                                                                                                                                                                                                                   |                                    |
|---------------------------------------------------------------------------------------------------------------------------------------------------------------------------------------------------------------------------------------------------------------------------------------------------------------------------------------------------------------------------------------------------|------------------------------------|
| <b>10</b>                                                                                                                                                                                                                                                                                                                                                                                         | <b>ប័ណ្ណបើកប្រាក់សង/ប័ណ្ណសមធម៌</b> |
| 10.1 តើអ្នកមានកម្មវិធីធានារ៉ាប់រងសុខភាព/ផ្នែកវេជ្ជសាស្ត្រឯកជន ឬរដ្ឋដែរឬទេ?<br>(ប្រសិនបើគ្មាន សូមបន្តទៅសំណួរ 10.2) <span style="float: right;"><input type="checkbox"/> មាន <input type="checkbox"/> គ្មាន</span>                                                                                                                                                                                  |                                    |
| ក បើមាន ប្រភេទណា?<br><input type="checkbox"/> ប្រាក់សំណង <input type="checkbox"/> ប្រាក់ឧបត្ថម្ភផ្នែកវេជ្ជសាស្ត្រប្រចាំខែ <input type="checkbox"/> ប័ណ្ណសមធម៌ ("ប័ណ្ណសម្រាប់អ្នកក្រ")<br><input type="checkbox"/> មូលនិធិគ្រួសារ/សហគមន៍ <input type="checkbox"/> គម្រោងរបស់ប្រឹក្សាខាងលិច (កិច្ចសន្យា) <input type="checkbox"/> ម្ចាស់ជំនួយ<br><input type="checkbox"/> ផ្សេងទៀត (បញ្ជាក់)៖ _____ |                                    |
| 10.2 តើអ្នកបានដឹងអំពីប្រព័ន្ធប័ណ្ណសមធម៌នៅកម្ពុជាដែរទេ? <span style="float: right;"><input type="checkbox"/> ដឹង <input type="checkbox"/> អត់ដឹង</span>                                                                                                                                                                                                                                            |                                    |
| 10.3 តើអ្នកបានទទួលការបើកប្រាក់សងវិញសម្រាប់ការចំណាយពាក់ព័ន្ធនឹងការព្យាបាលTBដែរឬទេ?* <input type="checkbox"/> បាន <input type="checkbox"/> អត់ទេ<br>(ប្រសិនបើបើកប្រាក់សងវិញសម្រាប់មុនពេលធ្វើរោគវិនិច្ឆ័យ/ពេលធ្វើរោគវិនិច្ឆ័យ សូមប្រើផ្នែកទី 4)                                                                                                                                                      |                                    |
| ក តើអ្នកបានទទួលសំណងវិញប៉ុន្មាន? _____ រៀល                                                                                                                                                                                                                                                                                                                                                         |                                    |

|                                                                                                                                                                                                                                                                                                                                |                                 |
|--------------------------------------------------------------------------------------------------------------------------------------------------------------------------------------------------------------------------------------------------------------------------------------------------------------------------------|---------------------------------|
| <b>11</b>                                                                                                                                                                                                                                                                                                                      | <b>ការចំណាយសម្រាប់ការដោះទំល</b> |
| 11.1 តើអ្នកបានខ្ចីប្រាក់ពីគេដែរឬទេទាំងមុន/ក្រោយរោគវិនិច្ឆ័យTB? (ប្រសិនបើអត់ទេ បន្តទៅសំណួរ 11.2)<br><span style="float: right;"><input type="checkbox"/> បានខ្ចី <input type="checkbox"/> អត់ខ្ចី</span>                                                                                                                        |                                 |
| ក ប្រសិនបើបានខ្ចី តើខ្ចីគេប៉ុន្មាន? _____ រៀល                                                                                                                                                                                                                                                                                  |                                 |
| ខ តើអ្នកខ្ចីពីនរណា?<br>(គូសទាំងអស់ប្រសិនបើមាន) <span style="float: right;"><input type="checkbox"/> គ្រួសារ <input type="checkbox"/> អ្នកជិតខាង/មិត្តភក្តិ <input type="checkbox"/> ធនាគារឯកជន</span><br><span style="float: right;"><input type="checkbox"/> សហគមន៍ <input type="checkbox"/> ផ្សេងទៀត (បញ្ជាក់)៖ _____</span> |                                 |
| គ តើកម្ចីនោះមានការប្រាក់ប៉ុន្មាន? (%)<br>_____ % <span style="float: right;"><input type="checkbox"/> ពុំមានការប្រាក់ <input type="checkbox"/> ខ្ញុំពុំតម្រូវឱ្យសងវិញទេ</span>                                                                                                                                                 |                                 |
| 11.2 តើអ្នកបានលក់ទ្រព្យសម្បត្តិសម្រាប់ការចំណាយលើជំងឺរបេងដែរឬទេ? <input type="checkbox"/> បាទ/ចាស <input type="checkbox"/> ទេ<br>ប្រសិនបើលក់ តើលក់អ្វី?                                                                                                                                                                         |                                 |
| ក <input type="checkbox"/> ដី <input type="checkbox"/> បសុសត្វ <input type="checkbox"/> មធ្យោបាយធ្វើដំណើរ/យានជំនិះ <input type="checkbox"/> របស់របរក្នុងផ្ទះ<br><input type="checkbox"/> ផលិតផលកសិកម្ម <input type="checkbox"/> ផ្សេងទៀត (បញ្ជាក់)៖ _____                                                                      |                                 |
| ខ តើទ្រព្យសម្បត្តិដែលអ្នកលក់មានតម្លៃប្រហាក់ប្រហែលប៉ុន្មាននៅលើទីផ្សារ? _____ រៀល                                                                                                                                                                                                                                                |                                 |
| គ តើអ្នកលក់វត្ថុនោះបានថ្លៃប៉ុន្មាន? _____ រៀល                                                                                                                                                                                                                                                                                  |                                 |

| 12   | <b>ព័ត៌មានសង្គមសេដ្ឋកិច្ច ស្ថានភាព និងប្រាក់ចំណូលរបស់បុគ្គល</b>                                                                                                                                                                                                                                                                                                                                                                                                                                                                                                                                                                                                                                                                                                    |
|------|--------------------------------------------------------------------------------------------------------------------------------------------------------------------------------------------------------------------------------------------------------------------------------------------------------------------------------------------------------------------------------------------------------------------------------------------------------------------------------------------------------------------------------------------------------------------------------------------------------------------------------------------------------------------------------------------------------------------------------------------------------------------|
| 12.1 | តើនរណាជាអ្នករកចំណូលសំខាន់បំផុតនៅក្នុងគ្រួសារ?<br><input type="checkbox"/> អ្នកជំងឺ <input type="checkbox"/> ប្រពន្ធ/ម្តាយ <input type="checkbox"/> ប្តី/ឪពុក <input type="checkbox"/> គ្រួសារសាច់ញាតិច្រើន<br><input type="checkbox"/> កូនប្រុស/កូនស្រី <input type="checkbox"/> ផ្សេងទៀត (បញ្ជាក់)៖ _____                                                                                                                                                                                                                                                                                                                                                                                                                                                         |
| 12.2 | តើការអប់រំខ្ពស់បំផុតកម្រិតណា?<br><b>ក</b> អ្នកជំងឺ<br><input type="checkbox"/> មិនចេះអក្សរ <input type="checkbox"/> បឋមសិក្សា <input type="checkbox"/> មធ្យមសិក្សា <input type="checkbox"/> បញ្ចប់ការសិក្សា/សញ្ញាបត្រ <input type="checkbox"/> ផ្សេងៗ(បញ្ជាក់) _____<br><b>ខ</b> អ្នករកចំណូលសំខាន់បំផុត?<br><input type="checkbox"/> មិនចេះអក្សរ <input type="checkbox"/> បឋមសិក្សា <input type="checkbox"/> មធ្យមសិក្សា <input type="checkbox"/> បញ្ចប់ការសិក្សា/សញ្ញាបត្រ <input type="checkbox"/> ផ្សេងៗ(បញ្ជាក់) _____<br><b>គ</b> មេគ្រួសារ<br><input type="checkbox"/> មិនចេះអក្សរ <input type="checkbox"/> បឋមសិក្សា <input type="checkbox"/> មធ្យមសិក្សា <input type="checkbox"/> បញ្ចប់ការសិក្សា/សញ្ញាបត្រ <input type="checkbox"/> ផ្សេងៗ(បញ្ជាក់) _____ |
| 12.3 | តើអ្នកធ្វើការជាធម្មតាដែរឬទេ <b>មុនពេលធ្វើពេទ្យវិនិច្ឆ័យTB?</b><br><input type="checkbox"/> មានការងារធ្វើជាធម្មតា <input type="checkbox"/> ឈប់សម្រាកដោយមានជំងឺ <input type="checkbox"/> នៅរៀន <input type="checkbox"/> ការងារផ្ទះ<br><input type="checkbox"/> ទេ ធ្វើការងារម្តងម្កាល <input type="checkbox"/> ចូលនិវត្តន៍ <input type="checkbox"/> ផ្សេងៗទៀត (បញ្ជាក់) _____                                                                                                                                                                                                                                                                                                                                                                                        |
| 12.4 | តើអ្នកធ្វើការជាធម្មតាដែរឬទេ <b>ក្នុងអំឡុងពេលព្យាបាលTB?</b><br><input type="checkbox"/> មានការងារធ្វើជាធម្មតា <input type="checkbox"/> ឈប់សម្រាកដោយមានជំងឺ <input type="checkbox"/> នៅរៀន <input type="checkbox"/> ការងារផ្ទះ<br><input type="checkbox"/> ទេ ធ្វើការងារម្តងម្កាល <input type="checkbox"/> ចូលនិវត្តន៍ <input type="checkbox"/> ផ្សេងៗទៀត (បញ្ជាក់) _____<br><b>ក</b> តើមូលហេតុដែលមិនធ្វើការ គឺមកពីជំងឺរបេងមែនទេ? <input type="checkbox"/> បាទ/ចាស <input type="checkbox"/> ទេ<br><b>ខ</b> ប្រសិនបើដូច្នោះមែន តើពេលណាជាពេលធ្វើការចុងក្រោយរបស់អ្នក? កាលបរិច្ឆេទ (ខែ ឆ្នាំ) _____                                                                                                                                                                      |
| 12.5 | តើ <b>បច្ចុប្បន្ន</b> អ្នកធ្វើការងារបានជាធម្មតាដែរឬទេ?<br><input type="checkbox"/> មានការងារធ្វើជាធម្មតា <input type="checkbox"/> ឈប់សម្រាកដោយមានជំងឺ <input type="checkbox"/> នៅរៀន <input type="checkbox"/> ការងារផ្ទះ<br><input type="checkbox"/> ទេ ធ្វើការងារម្តងម្កាល <input type="checkbox"/> ចូលនិវត្តន៍ <input type="checkbox"/> ផ្សេងៗទៀត (បញ្ជាក់) _____<br><b>ក</b> តើមូលហេតុដែលមិនធ្វើការ គឺមកពីជំងឺរបេងមែនទេ? <input type="checkbox"/> បាទ/ចាស <input type="checkbox"/> ទេ<br><b>ខ</b> ប្រសិនបើដូច្នោះមែន តើពេលណាជាពេលធ្វើការចុងក្រោយរបស់អ្នក? កាលបរិច្ឆេទ (ខែ ឆ្នាំ) _____                                                                                                                                                                          |
| 12.6 | តើប្រាក់ខែត្រូវបើកឱ្យអ្នកតាមរបៀបណា?<br><input type="checkbox"/> សាច់ប្រាក់ <input type="checkbox"/> សម្ភារ <input type="checkbox"/> សាច់ប្រាក់ និងសម្ភារ <input type="checkbox"/> ពុំមានប្រាក់ខែ<br><input type="checkbox"/> ប្រាក់ខែផ្ទេរតាមធនាគារ <input type="checkbox"/> ផ្សេងទៀត (បញ្ជាក់)៖ _____                                                                                                                                                                                                                                                                                                                                                                                                                                                             |
| 12.7 | តើប្រាក់ចំណូលប្រចាំសប្តាហ៍របស់អ្នកប៉ុន្មានជាមធ្យម <b>មុនពេលមានជំងឺរបេង?</b><br>(គិតទាំង ការទ្រទ្រង់ផ្នែកសុខមាលភាព ពិការភាព ឬ ការគាំទ្រផ្នែកសង្គមផ្សេងទៀត)<br>_____ រៀល/សប្តាហ៍ <input type="checkbox"/> ពុំមានចំណូល                                                                                                                                                                                                                                                                                                                                                                                                                                                                                                                                                |
| 12.8 | តើប្រាក់ចំណូលប្រចាំសប្តាហ៍របស់អ្នកប៉ុន្មានជាមធ្យម <b>ក្នុងពេលមានជំងឺរបេង?</b>                                                                                                                                                                                                                                                                                                                                                                                                                                                                                                                                                                                                                                                                                      |

លេខកូដអ្នកចូលរួម: \_\_\_\_\_

(គិតទាំង ការទ្រទ្រង់ផ្នែកសុខមាលភាព ពិការភាព ឬការគាំទ្រផ្នែកសង្គមផ្សេងទៀត)  
\_\_\_\_\_ រៀល/សប្តាហ៍  ពុំមានចំណូល  
ក ប្រសិនបើចម្លើយខុសពីសំណួរ 12.7 តើការប្រែប្រួលនោះមានពាក់ព័ន្ធនឹងជំងឺរបេងទេ?  បាទ/ចាស  ទេ

**12.9 តើប្រាក់ចំណូលប្រចាំសប្តាហ៍របស់អ្នកប៉ុន្មានជាមធ្យម ក្នុងពេលបច្ចុប្បន្ន?**  
(គិតទាំង ការទ្រទ្រង់ផ្នែកសុខមាលភាព ពិការភាព ឬការគាំទ្រផ្នែកសង្គមផ្សេងទៀត)  
\_\_\_\_\_ រៀល/សប្តាហ៍  ពុំមានចំណូល  
ក ប្រសិនបើចម្លើយខុសពីសំណួរ 12.7 តើការប្រែប្រួលនោះមានពាក់ព័ន្ធនឹងជំងឺរបេងទេ?  បាទ/ចាស  ទេ

**12.10 តើអ្នកធ្លាប់ឈប់ធ្វើការ/ឈប់ទៅសាលា/ឈប់ធ្វើការងារផ្ទះ ដោយសារតែជំងឺរបេងទេ?**  បាទ/ចាស  ទេ  
ក ប្រសិនបើឈប់ រយៈពេលប៉ុន្មាន? \_\_\_\_\_ ខែ

**12.11 តើមានអ្នកណានៅផ្ទះ មើលថែអ្នកជាពិសេសទេ នៅមុន និង ក្រោយពេលធ្វើរោគវិនិច្ឆ័យជំងឺរបេង?**  
 បាទ/ចាស  ទេ  
ក ប្រសិនបើមាន រយៈពេលប៉ុន្មាន? \_\_\_\_\_ សប្តាហ៍  
ខ តើគាត់បោះបង់ ឬកាត់បន្ថយការងាររកចំណូលរបស់គាត់មកនៅផ្ទះ និងមើលថែទាំអ្នកដែរឬទេ?  បាទ/ចាស  ទេ  
គ បើបាទ/ចាស តើគាត់បាត់បង់ប្រាក់ចំណូលជាមធ្យមប៉ុន្មានក្នុងមួយសប្តាហ៍? \_\_\_\_\_ រៀល

**12.12 តើអ្នកធ្វើការងារញឹកញាប់កម្រិតណា មុនពេលអ្នកមានជំងឺរបេង?**  
 មួយឆ្នាំពេញ  តាមរដូវ/ខែខ្លះនៃឆ្នាំ  ការងារប្រចាំថ្ងៃ  ផ្សេងៗ(បញ្ជាក់) \_\_\_\_\_

**12.13 តើអ្នកត្រូវប្តូរការងារទេ នៅពេលមានជំងឺរបេង?**  បាទ/ចាស  ទេ

**12.14 តើការងារចម្បងរបស់អ្នកជាអ្វីនៅពេលបច្ចុប្បន្ន?**  
 លក់ដូរ/ផ្តល់សេវា  កសិករ  នៅផ្ទះ  កម្មករផ្នែកផលិតកម្ម/សំណង់  
 សិស្ស/និស្សិត  គ្មានការងារ  ការងាររដ្ឋ  ផ្សេងទៀត (បញ្ជាក់) \_\_\_\_\_

**12.15 តើជាមធ្យមអ្នកធ្វើការប៉ុន្មានម៉ោងក្នុងមួយថ្ងៃ?**  
ក មុនពេលមានជំងឺរបេង? \_\_\_\_\_ ម៉ោង  
ខ ក្នុងពេលព្យាបាល? \_\_\_\_\_ ម៉ោង  
គ ក្រោយពេលព្យាបាល? \_\_\_\_\_ ម៉ោង

**12.16 ប្រសិនបើចម្លើយខុសគ្នា តើការប្រែប្រួលនោះមានពាក់ព័ន្ធនឹងជំងឺរបេងដែរទេ?**  មាន  ទេ  
ក ប្រសិនបើចម្លើយខុសគ្នា តើមាននរណាម្នាក់ធ្វើការងារដែលអ្នកធ្លាប់ធ្វើពីមុនទេ? (គូសទាំងអស់ប្រសិនបើមាន)  
 កូនស្រី  កូនប្រុស  ប្តី/ប្រពន្ធ  មិត្តភក្តិ  អត់មាន  សមាជិកគ្រួសារផ្សេងទៀត

**12.17 តើអ្នកមានកូនគ្រប់អាយុចូលរៀន ឬ កូនដែលក្រោមអាយុចូលរៀនទេ? (ប្រសិនបើគ្មាន សូមបន្តទៅសំណួរ 12.19)**  
 មាន  អត់មាន

**12.18 កូនដល់អាយុចូលរៀនរបស់អ្នកបានទៅរៀនទៀងទាត់ទេ ក្នុងអំឡុងពេលអ្នកព្យាបាល?**  
 បានទៅ  អត់បានទៅ



លេខកូដអ្នកចូលរួម: \_\_\_\_\_

|                                                                                                                                                                                                                                                                                                                           |                                                                                                       |                                                              |
|---------------------------------------------------------------------------------------------------------------------------------------------------------------------------------------------------------------------------------------------------------------------------------------------------------------------------|-------------------------------------------------------------------------------------------------------|--------------------------------------------------------------|
| <b>ក</b>                                                                                                                                                                                                                                                                                                                  | ប្រសិនបើមិនបានទៅ ហេតុអ្វី? (ជ្រើសចម្លើយតែមួយដែលចំបង)                                                  |                                                              |
|                                                                                                                                                                                                                                                                                                                           | <input type="checkbox"/> ត្រូវជួយកិច្ចការផ្ទះ                                                         | <input type="checkbox"/> អត់មានលុយសម្រាប់ថ្លៃសាលា            |
|                                                                                                                                                                                                                                                                                                                           | <input type="checkbox"/> ត្រូវធ្វើការដើម្បីរកប្រាក់                                                   | <input type="checkbox"/> ផ្សេងទៀត (បញ្ជាក់): _____           |
| <b>ខ</b>                                                                                                                                                                                                                                                                                                                  | តើអ្នកមានកូនគ្រប់អាយុចូលរៀន ឬកូនដែលក្រោមអាយុចូលរៀនជួយធ្វើការរកប្រាក់សម្រាប់ចំណាយដោយសារជំងឺរបេងដែរឬទេ? | <input type="checkbox"/> មាន <input type="checkbox"/> អត់មាន |
| <b>12.19</b> ប្រសិនបើអ្នកជ្រើសរើសអ្នកណាម្នាក់ឱ្យមកធ្វើការនៅក្នុងផ្ទះរបស់អ្នក តើអ្នកត្រូវចំណាយប្រាក់ជូលគេប៉ុន្មាន?                                                                                                                                                                                                         |                                                                                                       |                                                              |
| <b>ក</b>                                                                                                                                                                                                                                                                                                                  | ពេលអ្នកឈឺ? _____ រៀល/ថ្ងៃ                                                                             |                                                              |
| <b>ខ</b>                                                                                                                                                                                                                                                                                                                  | ពេលអ្នកជា? _____ រៀល/ថ្ងៃ                                                                             |                                                              |
| <b>12.20</b> តើអ្នកអាចរកប្រាក់ចំណូលដោយខ្លួនឯងដោយមិនពឹងលើអ្នកដទៃដែរឬទេ? <span style="float: right;"><input type="checkbox"/> បាទ/ចាស      <input type="checkbox"/> ទេ</span>                                                                                                                                               |                                                                                                       |                                                              |
| <b>12.21</b> តើជំងឺរបេងបានជះឥទ្ធិពលដល់ជីវិតសង្គម ឬជីវិតឯកជនរបស់អ្នក តាមរបៀបណាមួយដែរឬទេ?<br>(គូសទាំងអស់ប្រសិនបើមាន)                                                                                                                                                                                                        |                                                                                                       |                                                              |
| <input type="checkbox"/> ទេ <input type="checkbox"/> លែងលះ <input type="checkbox"/> បាត់បង់ការងារ <input type="checkbox"/> ឈប់រៀន <input type="checkbox"/> កូនឈឺ<br><input type="checkbox"/> រស់នៅដាច់ពីប្តីប្រពន្ធ/ដៃគូ <input type="checkbox"/> រំខានដល់ជីវិតផ្លូវភេទ <input type="checkbox"/> ផ្សេងទៀត (បញ្ជាក់) _____ |                                                                                                       |                                                              |
| <b>12.22</b> តើជំងឺរបេងធ្វើឱ្យអ្នកមានបញ្ហាហិរញ្ញវត្ថុដែរឬទេ? <span style="float: right;"><input type="checkbox"/> បាទ/ចាស      <input type="checkbox"/> ទេ</span>                                                                                                                                                         |                                                                                                       |                                                              |

**13 ប្រាក់ចំណូល និងការចំណាយក្នុងគ្រួសារ**

|             |                                                                                                                                                                                                                                                                                                                                                                                                                             |
|-------------|-----------------------------------------------------------------------------------------------------------------------------------------------------------------------------------------------------------------------------------------------------------------------------------------------------------------------------------------------------------------------------------------------------------------------------|
| <b>13.1</b> | តើអាចប៉ាន់ស្មានបានទេថា ប្រាក់ចំណូលជាមធ្យមក្នុងគ្រួសារអ្នកក្នុងមួយខែប៉ុន្មានមុនពេលអ្នកមានជំងឺរបេង?<br>(រាប់បញ្ចូលមនុស្សទាំងអស់នៅក្នុងគ្រួសារគិតទាំង ប្រាក់ឧបត្ថម្ភពីឪពុកម្តាយ ប្រាក់ឧបត្ថម្ភសម្រាប់សុខភាពពីរដ្ឋ ឬជំនួយផ្នែកសង្គម)      ប្រាក់ចំណូលអ្នកជំងឺ _____      ប្រាក់សុខភាព _____<br><br>ប្រាក់ចំណូលអ្នកផ្សេងទៀតក្នុងគ្រួសារ _____      ជំនួយពីរដ្ឋាភិបាល _____<br>ផ្សេងទៀត (បញ្ជាក់): _____      សរុប _____      រៀល |
| <b>13.2</b> | តើអាចប៉ាន់ស្មានបានទេថា ប្រាក់ចំណូលជាមធ្យមក្នុងគ្រួសារអ្នកក្នុងមួយខែប៉ុន្មានក្នុងពេលអ្នកមានជំងឺរបេង?<br>ប្រាក់ចំណូលអ្នកជំងឺ _____      ប្រាក់ចំណូលអ្នកផ្សេងទៀតក្នុងគ្រួសារ _____      ប្រាក់សុខភាព _____<br>ជំនួយពីរដ្ឋាភិបាល _____      ផ្សេងទៀត (បញ្ជាក់): _____      សរុប _____      រៀល                                                                                                                                  |
| <b>13.3</b> | តើប្រាក់ចំណូលជាមធ្យមក្នុងគ្រួសាររបស់អ្នកក្នុងមួយខែទទួលបានប៉ុន្មានក្រោយពេលអ្នកមានជំងឺរបេង?<br>ប្រាក់ចំណូលអ្នកជំងឺ _____      រៀល      ប្រាក់ចំណូលផ្សេងទៀតក្នុងគ្រួសារ _____      រៀល<br>ប្រាក់សុខភាព _____      រៀល      ជំនួយពីរដ្ឋាភិបាល _____      រៀល<br>ផ្សេងទៀត (បញ្ជាក់): _____      រៀល      សរុប _____      រៀល                                                                                                     |
| <b>13.4</b> | តើជាទូទៅមានមនុស្សប៉ុន្មាននាក់គេងនៅផ្ទះរបស់អ្នក? (គិតទាំងអ្នកជំងឺ) _____      នាក់                                                                                                                                                                                                                                                                                                                                           |
| <b>13.5</b> | តើមានសមាជិកគ្រួសារប៉ុន្មាននាក់ដែលមានការងារធ្វើ និងមានប្រាក់ខែ? (គិតទាំងអ្នកជំងឺនិងការទូទាត់ជាសម្ភារ)                                                                                                                                                                                                                                                                                                                        |

លេខកូដអ្នកចូលរួម: \_\_\_\_\_

|                                                                                                                                                                                                                                                                                                                                                                  |                                                                                                                    |
|------------------------------------------------------------------------------------------------------------------------------------------------------------------------------------------------------------------------------------------------------------------------------------------------------------------------------------------------------------------|--------------------------------------------------------------------------------------------------------------------|
| បុគ្គលិកផលកសិកម្ម)                                                                                                                                                                                                                                                                                                                                               | នាក់                                                                                                               |
| <b>13.6</b> ក្រៅពីរូបអ្នក តើមាននរណាម្នាក់ផ្សេងទៀតនៅក្នុងគ្រួសារអ្នក ទទួលការព្យាបាលជំងឺរបេងដែរឬទេ?<br><input type="checkbox"/> បាទ/ចាស <input type="checkbox"/> ទេ                                                                                                                                                                                                |                                                                                                                    |
| ក បើមាន ប៉ុន្មាននាក់?                                                                                                                                                                                                                                                                                                                                            | នាក់                                                                                                               |
| <b>13.7</b> តើជាមធ្យម គ្រួសារអ្នកចំណាយលើចំណីអាហារប៉ុន្មានជាមធ្យមរាល់ខែ នៅមុនពេល ក្នុងពេល និង ក្រោយពេល<br>អ្នកមានជំងឺរបេង (ប្រសិនបើផលិតផលដាំខ្លួនឯង) ប្រសិនបើចំណីអាហារដែលអ្នកបានទទួលទានក្នុងមួយខែ<br>មុនពេល/ក្នុងពេល/ក្រោយពេលមានជំងឺរបេង ត្រូវបានយកទៅលក់នៅទីផ្សារ តើអាចមានតម្លៃប៉ុន្មាន?<br>(បូកនឹងទឹកប្រាក់ជាមធ្យមដែលអ្នកត្រូវចំណាយសម្រាប់អាហារដែលមិនដាំខ្លួនឯង) |                                                                                                                    |
| ក មុនពេល                                                                                                                                                                                                                                                                                                                                                         | រៀល                                                                                                                |
| ខ ក្នុងពេល                                                                                                                                                                                                                                                                                                                                                       | រៀល                                                                                                                |
| គ ក្រោយពេល                                                                                                                                                                                                                                                                                                                                                       | រៀល                                                                                                                |
|                                                                                                                                                                                                                                                                                                                                                                  | <b>22.</b> បើចម្លើយខុសពី ក តើបណ្តាលមកពីជំងឺរបេងមែនទេ? <input type="checkbox"/> មែន <input type="checkbox"/> មិនមែន |
|                                                                                                                                                                                                                                                                                                                                                                  | <b>គ2.</b> បើចម្លើយខុសពី ក តើបណ្តាលមកពីជំងឺរបេងមែនទេ? <input type="checkbox"/> មែន <input type="checkbox"/> មិនមែន |

|                                                                                                                                                                                                                                                                                                                                                                                              |                               |
|----------------------------------------------------------------------------------------------------------------------------------------------------------------------------------------------------------------------------------------------------------------------------------------------------------------------------------------------------------------------------------------------|-------------------------------|
| <b>14</b>                                                                                                                                                                                                                                                                                                                                                                                    | <b>សូចនាករសង្គមសេដ្ឋកិច្ច</b> |
| <b>14.1</b> តើទឹកដែលអ្នកយកមកពិសាមានប្រភពចំបងមកពីណា?<br><input type="checkbox"/> ទឹកភ្លៀង <input type="checkbox"/> បឹង/ត្រពាំង/ទន្លេ <input type="checkbox"/> អណ្តូងឯកជន/លូ<br><input type="checkbox"/> ទឹកទុយោ <input type="checkbox"/> ទឹកច្រកដប <input type="checkbox"/> ទឹករដ្ឋ                                                                                                           |                               |
| <b>14.3</b> តើបង្គន់អនាម័យប្រភេទណាដែលអ្នកប្រើប្រាស់?<br><input type="checkbox"/> មិនមាន/តាមគុម្ពាធប្រៃ/វាលស្រែ <input type="checkbox"/> បង្គន់មិនចាក់ទឹករួម <input type="checkbox"/> បង្គន់មិនចាក់ទឹកផ្ទាល់ខ្លួន <input type="checkbox"/> បង្គន់ចាក់ទឹក                                                                                                                                      |                               |
| <b>14.4</b> តើផ្ទះរបស់អ្នកមានបន្ទប់ចំនួនប៉ុន្មាន?<br><input type="checkbox"/> មួយ <input type="checkbox"/> ពីរ <input type="checkbox"/> បី <input type="checkbox"/> បួន ឬ លើសពីនេះ<br>ក តើផ្ទះ/កន្លែងដែលអ្នកស្នាក់នៅជាកម្មសិទ្ធិរបស់អ្នកមែនទេ? <input type="checkbox"/> មែន <input type="checkbox"/> មិនមែន                                                                                  |                               |
| <b>14.5</b> តើអ្នកមាន? ចម្លើយអាចមានលើសពីមួយ<br><input type="checkbox"/> វិទ្យុ <input type="checkbox"/> ទូរទស្សន៍ <input type="checkbox"/> ទូរស័ព្ទដៃ <input type="checkbox"/> ទូរស័ព្ទលើតុ <input type="checkbox"/> ទូរទឹកកក<br><input type="checkbox"/> ទូរដាក់ខោអាវ <input type="checkbox"/> ម៉ាស៊ីនដេរ <input type="checkbox"/> ម៉ាស៊ីនចាក់ CD/DVD <input type="checkbox"/> ម៉ាស៊ីនភ្លើង |                               |
| <b>14.6</b> ប្រសិនបើរដ្ឋាភិបាលអាចផ្តល់សេវាមួយចំនួនដល់អ្នកដើម្បីជួយសម្រាលបន្ទុកជំងឺរបេងអ្នក និងគ្រួសារអ្នក<br>តើអ្នកចង់បានសេវាអ្វី? សូមជ្រើសរើសតែមួយ<br><input type="checkbox"/> សំបុត្របញ្ជាក់សម្រាប់ធ្វើដំណើរ <input type="checkbox"/> សំបុត្របញ្ជាក់សម្រាប់អាហារ<br><input type="checkbox"/> សេវាដែលមានប្រសិទ្ធភាពជាងនេះ <input type="checkbox"/> ផ្សេងទៀត (បញ្ជាក់)៖ _____                |                               |
| <b>14.7</b> តើអ្នកអាចចំណាយប្រាក់បានប៉ុន្មានសម្រាប់ការព្យាបាលជំងឺរបេងនៅកន្លែងដំបូង?<br><input type="checkbox"/> ក្រោម \$20 <input type="checkbox"/> \$20-50 <input type="checkbox"/> \$51-100 <input type="checkbox"/> ច្រើនជាង100\$                                                                                                                                                          |                               |

លេខកូដអ្នកចូលរួម: \_\_\_\_\_

**មតិយោបល់របស់អ្នកសម្ភាសន៍**

ហត្ថលេខា

តើអ្នកត្រូវចំណាយលុយម្តងៗចំនួនប៉ុន្មានក្នុងការទៅជួបពេទ្យ មុនពេលដឹងថាអ្នកមានជំងឺរបេង រួមបញ្ចូលទាំងការមកធ្វើពេទ្យវិនិច្ឆ័យ?\*

គ្រប់ចំនុចដែលមិនបានបំពេញ ត្រូវ ដាក់ N/A. ត្រូវបំពេញតែមួយបន្ទាត់ក្នុងការមកជួមម្តងៗ ហើយបំពេញអោយត្រូវតាមទៅលំដាប់លំដោយ

| ការណាត់ជួប | A                       | B                          | C                     | D                                                | E                                | F                                                         | G                                                | H                       | I                            | J                     | K                   | L                        | M                   |
|------------|-------------------------|----------------------------|-----------------------|--------------------------------------------------|----------------------------------|-----------------------------------------------------------|--------------------------------------------------|-------------------------|------------------------------|-----------------------|---------------------|--------------------------|---------------------|
|            | ប្រភេទនៃសេវាសុខាភិបាល** | កាលបរិច្ឆេទនៃការណាត់ជួប*** | ចម្ងាយផ្លូវ(គីឡូម៉ែត) | រយៈពេលណាត់ជួបសរុប(គិតទាំងការធ្វើដំណើរទៅមកជានាទី) | តំលៃនៃការចុះឈ្មោះ/ការពិគ្រោះជំងឺ | តំលៃតេស្ត (ពិនិត្យកំហាក ឬ អ៊ីយ៉ូឌីន ផ្សេងទៀតលើកលែង x-ray) | តំលៃការស្នើអ៊ុច(ថ្លៃបញ្ជូនទៅថត និងថ្លៃធ្វើដំណើរ) | តំលៃថ្នាំ (គ្រប់ប្រភេទ) | ថ្លៃធ្វើដំណើរ (ទាំងទៅទាំងមក) | ថ្លៃម្ហូបអាហារទាំងអស់ | ថ្លៃស្នាក់នៅទាំងអស់ | ចំណាយសរុបក្នុងការទៅម្តងៗ | ការធានារ៉ាប់រងឬសំណង |
| 1          |                         |                            |                       | T:                                               |                                  |                                                           |                                                  |                         | Pt:                          | Pt:                   | Pt:                 | Pt:                      |                     |
|            |                         |                            |                       | O:                                               |                                  |                                                           |                                                  |                         | G:                           | G:                    | G:                  | G:                       |                     |
| 2          |                         |                            |                       | T:                                               |                                  |                                                           |                                                  |                         | Pt:                          | Pt:                   | Pt:                 | Pt:                      |                     |
|            |                         |                            |                       | O:                                               |                                  |                                                           |                                                  |                         | G:                           | G:                    | G:                  | G:                       |                     |
| 3          |                         |                            |                       | T:                                               |                                  |                                                           |                                                  |                         | Pt:                          | Pt:                   | Pt:                 | Pt:                      |                     |
|            |                         |                            |                       | O:                                               |                                  |                                                           |                                                  |                         | G:                           | G:                    | G:                  | G:                       |                     |
| 4          |                         |                            |                       | T:                                               |                                  |                                                           |                                                  |                         | Pt:                          | Pt:                   | Pt:                 | Pt:                      |                     |
|            |                         |                            |                       | O:                                               |                                  |                                                           |                                                  |                         | G:                           | G:                    | G:                  | G:                       |                     |
| 5          |                         |                            |                       | T:                                               |                                  |                                                           |                                                  |                         | Pt:                          | Pt:                   | Pt:                 | Pt:                      |                     |
|            |                         |                            |                       | O:                                               |                                  |                                                           |                                                  |                         | G:                           | G:                    | G:                  | G:                       |                     |
| 6          |                         |                            |                       | T:                                               |                                  |                                                           |                                                  |                         | Pt:                          | Pt:                   | Pt:                 | Pt:                      |                     |
|            |                         |                            |                       | O:                                               |                                  |                                                           |                                                  |                         | G:                           | G:                    | G:                  | G:                       |                     |

|                                                                                   |  |  |  |    |  |  |  |  |     |     |     |     |  |
|-----------------------------------------------------------------------------------|--|--|--|----|--|--|--|--|-----|-----|-----|-----|--|
| 7                                                                                 |  |  |  | T: |  |  |  |  | Pt: | Pt: | Pt: | Pt: |  |
|                                                                                   |  |  |  | O  |  |  |  |  | G   | G   | G   | G   |  |
| 8                                                                                 |  |  |  | T: |  |  |  |  | Pt: | Pt: | Pt: | Pt: |  |
|                                                                                   |  |  |  | O  |  |  |  |  | G   | G   | G   | G   |  |
| 9                                                                                 |  |  |  | T: |  |  |  |  | Pt: | Pt: | Pt: | Pt: |  |
|                                                                                   |  |  |  | O  |  |  |  |  | G   | G   | G   | G   |  |
| ចំណាយសរុបមុន និង ពេលធ្វើពេកវិនិច្ឆ័យ(ផលបូកនៃចំណាយសរុបម្តងៗ-សំណងសរុបនៃធានារ៉ាប់រង) |  |  |  |    |  |  |  |  |     |     | រៀល |     |  |

\* នេះរួមបញ្ចូលទាំងការធ្វើដំណើរទៅកាន់កន្លែងអ្នករៀបចំ ACF ផងដែរ (បើអ្នកជំងឺ ACF ជ្រើស យក"៦" សម្រាប់ "ប្រភេទនៃការផ្តល់សេវា")

\*\*១. ពេទ្យរដ្ឋ ២. មណ្ឌលសុខភាព ៣. ពេទ្យឯកជន ៤. ឱសថស្ថាន កន្លែងលក់ថ្នាំ និង គ្រឿងទេស

៥. កន្លែងព្យាបាលដោយឱសថបុរាណ ៦. សហគមន៍ពិនិត្យជំងឺរបេង (ACF) ៧. ផ្សេងទៀត (បញ្ជាក់ក្នុងប្រអប់នេះ)

\*\*\* នេះគឺមានសារៈសំខាន់ខ្លាំងណាស់សម្រាប់ការសិក្សាស្រាវជ្រាវមួយនេះ។
